# Supplementary material for: Did government spending cuts to social care for older people lead to an increase in emergency hospital admissions? An ecological study, England 2005–2016
Source: PubMed Central journal article supplement — BMJ Open. 2019 Apr 25;9(4):e024577. doi: 10.1136/bmjopen-2018-024577 (PMC6501965; doi:10.1136/bmjopen-2018-024577), 2019-04-25
Supplement: bmjopen-2018-024577.draft_revisions.pdf [file bmjopen-2018-024577.draft_revisions.pdf]

# BMJ Open

BMJ Open is committed to open peer review. As part of this commitment we make the peer review history of every article we publish publicly available.

When an article is published we post the peer reviewers' comments and the authors' responses online. We also post the versions of the paper that were used during peer review. These are the versions that the peer review comments apply to.

The versions of the paper that follow are the versions that were submitted during the peer review process. They are not the versions of record or the final published versions. They should not be cited or distributed as the published version of this manuscript.

BMJ Open is an open access journal and the full, final, typeset and author-corrected version of record of the manuscript is available on our site with no access controls, subscription charges or pay-per-view fees (<http://bmjopen.bmj.com>).

If you have any questions on BMJ Open's open peer review process please email [info.bmjopen@bmj.com](mailto:info.bmjopen@bmj.com)

# BMJ Open

## The Relationship between Government Spending on Social Care for Older People and Emergency Hospital Admissions in England

|                               |                                                                                                                                                                                                                                                                                                                                                                                                           |
|-------------------------------|-----------------------------------------------------------------------------------------------------------------------------------------------------------------------------------------------------------------------------------------------------------------------------------------------------------------------------------------------------------------------------------------------------------|
| Journal:                      | <i>BMJ Open</i>                                                                                                                                                                                                                                                                                                                                                                                           |
| Manuscript ID                 | bmjopen-2018-024577                                                                                                                                                                                                                                                                                                                                                                                       |
| Article Type:                 | Research                                                                                                                                                                                                                                                                                                                                                                                                  |
| Date Submitted by the Author: | 02-Jul-2018                                                                                                                                                                                                                                                                                                                                                                                               |
| Complete List of Authors:     | Seamer, Paul; NHS Midlands and Lancashire Commissioning Support Unit, The Strategy Unit<br>Brake, Simon; NHS Walsall Clinical Commissioning Group<br>Moore, Patrick; University of Birmingham, Institute of Applied Health Research<br>Mohammed, Mohammed ; University of Bradford, Faculty of Health Studies<br>Wyatt, Steven; NHS Midlands and Lancashire Commissioning Support Unit, The Strategy Unit |
| Keywords:                     | social care, emergency hospital admissions, older people, government spending                                                                                                                                                                                                                                                                                                                             |
|                               |                                                                                                                                                                                                                                                                                                                                                                                                           |

SCHOLARONE™  
Manuscripts

1  
2  
3 **The Relationship between Government Spending on Social Care for Older People and**  
4 **Emergency Hospital Admissions in England**  
5  
6  
7  
8  
9

10 **Paul Seamer**

11 The Strategy Unit, NHS Midlands and Lancashire Commissioning Support Unit  
12 West Bromwich, West Midlands UK  
13

14 **Prof. Simon Brake**

15 NHS Walsall Clinical Commissioning Group  
16 Walsall, West Midlands, UK  
17

18 **Dr. Patrick Moore**

19 Institute of Applied Health Research, University of Birmingham  
20 Birmingham, West Midlands, UK  
21

22 **Prof. Mohammed Mohammed**

23 Faculty of Health Studies, University of Bradford  
24 Bradford, West Yorkshire, UK  
25

26 **Steven Wyatt (corresponding author)**

27 The Strategy Unit, NHS Midlands and Lancashire Commissioning Support Unit  
28 Postal address: Kingston House, 438-450 High Street, West Bromwich, West Midlands, B70 9LD, UK  
29 Email: [swyatt@nhs.net](mailto:swyatt@nhs.net)  
30 Telephone: 0121 612 3872  
31  
32  
33  
34  
35

36 **Word count** : 4,569 words  
37  
38  
39  
40  
41  
42  
43  
44  
45  
46  
47  
48  
49  
50  
51  
52  
53  
54  
55  
56  
57  
58  
59  
60

## Abstract

**Objectives:** Government spending on social care in England reduced substantially in real terms following the economic crisis in 2008, meanwhile emergency admissions to hospitals have increased. We aimed to assess the extent to which reductions in social care spend on older people have led to increases in emergency hospital admissions.

**Design:** We used negative binomial regression for panel data to assess the relationship between emergency hospital admissions and government spend on social care for older people. We adjusted for population size and for levels of deprivation and health.

**Setting:** Hospitals and adult social care services in England between April 2005 And March 2016.

**Participants:** People aged 65 years and over resident in 132 local councils.

**Outcome measures:** Primary outcome variable - emergency hospital admissions of adults aged 65 years and over. Secondary outcome measure - emergency hospital admissions for ambulatory care sensitive conditions of adults aged 65 years and over.

**Results:** We found no significant relationship between the changes in the rate of government spend (£'000s) on social care for older people within councils and our primary outcome variable, emergency hospital admissions (IRR 1.009, 95% CI 0.965-1.056) or our secondary outcome measure, admissions for ambulatory care sensitive conditions (IRR 0.975, 95% CI 0.917-1.038).

**Conclusions:** We found no evidence to support the view that reductions in government spend on social care since 2008 have led to increases in emergency hospital admissions in older people. Policy makers may wish to review schemes, such as the Better Care Fund, which are predicated on a relationship between social care provision and emergency hospital admissions of older people.

### Strengths and limitations of this study

- This study explores the relationship between government spending on social care and emergency hospital admissions across a large area (132 councils) and a long period (10 years).
- The study includes a period of time when reductions in government spending on social care were large on average and variable between councils, increasing the opportunity to detect an impact on emergency hospital admissions.
- The study used panel data methods which help reduce the risk of omitted variable bias.
- Changes in the way councils record expenditure may have obscured the relationship with emergency hospital admissions.
- Sensitivity analysis was used to explore the possibility that the results are a function of the influential outliers or the choice of analytical method.

1  
2  
3  
4  
5  
6  
7  
8  
9  
10  
11  
12  
13  
14  
15  
16  
17  
18  
19  
20  
21  
22  
23  
24  
25  
26  
27  
28  
29  
30  
31  
32  
33  
34  
35  
36  
37  
38  
39  
40  
41  
42  
43  
44  
45  
46  
47  
48  
49  
50  
51  
52  
53  
54  
55  
56  
57  
58  
59  
60

For peer review only

## Introduction

The economic crisis beginning in 2008 caused many countries to cut public sector expenditure on health care. Successive governments in England have sought to maintain health spending by imposing a "ring fence". However central government grants to local councils, who are responsible for funding social care have been reduced.<sup>1</sup> Unlike health care, which is largely provided free at the point of use, social care for older people in England – such as support for people in residential care or personal care provided at home – is means-tested and the majority of recipients will be expected to contribute towards the cost of their care. The numbers of older people receiving government-funded social care fell by 40% between March 2008 and March 2014 whilst the population aged 65+ years increased by 15%.<sup>2,3</sup> While some people who are no longer supported by the state might choose to pay for care privately or to rely on informal care, others may have to just make do with less social care support.

Meanwhile demand for urgent and emergency care is rising. The number of people aged 65+ years attending Accident and Emergency departments in England rose by 64% between 2008 and 2015.<sup>4</sup> Looking forward, the number of people aged 65+ year is expected to grow from 9.9 million in 2016 to over 12 million by 2028.<sup>5</sup> There is growing concern that under-supply of social care is increasing pressures on urgent and emergency care by leaving older people at greater risk of hospital admission and delaying their discharge from hospital. Nearly nine out of ten NHS hospital finance directors believe that funding pressures on councils have had a negative impact on the performance of health services in their local area.<sup>6</sup>

Much of the evidence supporting this claim, however, is anecdotal. The effect of reductions in social care on the health and well-being of older people, and in particular their use of emergency healthcare services has not been quantified.<sup>7</sup> A small number of studies in European countries have found evidence of a trade-off between the number of hospital beds and the level of social care provision.<sup>8,9,10</sup> The reported effect, however, was relatively small; and the research mostly focused on long-term residential care and/or hospital length of stay, and pre-dates the most significant reductions in social care expenditure.

Many health systems are exploring the benefits of greater integration between health and care services.<sup>11</sup> In England, the current government's policy is predicated on the view that closer working between health and social care will ease pressure on emergency services. For example, the Better Care Fund, worth a minimum of £3.9 billion in 2016–17, is for joint projects between local government and the NHS.<sup>12</sup> The broad intention is to shift resources from the NHS into social care and community services by keeping patients out of hospitals, but much of the required investment will only become available if savings can be made from avoiding unplanned admissions to hospital or reducing length of stay.

The aim of this study is to determine the extent to which reductions in government spending on social care for older adults, following the economic crisis, have led to increases in emergency admissions to hospitals.

## Methods

### *Setting and study population*

Our analysis focused on local government councils with responsibility for providing adult social care services in England between 2005-06 and 2015-16. In 2015-16 there were 152 English councils with responsibility for providing adult social care services. Nine of these councils were only established following structural changes to local government in April 2009. These areas were excluded from all analyses. A further three councils were missing spend data for at least one year, these areas were also excluded. The City of London, the Isles of Scilly, and Rutland were excluded because we expected their small populations would cause instability. We excluded a further 5 councils that reported a year-on-year change in emergency hospital admissions for older people of more than 50% in one or more years between 2005/6 and 2015/16 on the basis that these jumps are implausible and are more likely to represent data errors. This left a balanced panel dataset of 1452 observations (N = 132, T = 11). The list of the councils excluded from the analysis is provided in supplementary file 1.

### *Data sources*

The data used in this study were collected from a number of national information systems. The main outcome variable in our analysis is counts of emergency admissions to hospitals (admissions that happen at short notice because of perceived clinical need) by people aged 65 years and over in each council area. We obtained this information from the Hospital Episode Statistics (HES) dataset. HES contains records of all admissions for patients admitted to NHS hospitals, and includes information on method of admission (e.g. emergency), diagnosis codes recording the primary reason the patient is being treated, and any secondary diagnoses relevant to their care.<sup>13</sup> We hypothesised that some types of admission are more likely to be avoidable by timely access to social care. Ambulatory care sensitive conditions (ACSCs) are a well-defined set of conditions where effective community care and case management can help prevent the need for hospital admission. Counts of emergency hospital admissions of people aged 65 and over for ACSC conditions were derived from HES and used as a secondary outcome measure.<sup>14</sup>

Our main exposure variable was government spending on social care. We obtained financial data relating to publicly-funded social care for older people (those aged 65+ years) from administrative returns provided to central government by the social services departments of councils providing adult social care services in England. Publicly-funded social care in England is targeted at those with the highest needs and lowest incomes. Older people who meet needs-based eligibility criteria but whose income and assets are above a set amount are required to contribute a proportion of the cost themselves, and some with needs receive no financial support. We calculated a series for councils' net expenditure by subtracting contributions paid by service users for their care from councils' gross total expenditure on services for older people. These expenditure levels include income from the NHS through schemes such as the Better Care Fund.

In 2014-15, there were changes to the financial reporting framework used by councils to collect these data that meant we needed to 'map' categories of council income across the two frameworks to obtain a consistent series on councils' income from client contributions. Bridging files were published by NHS Digital to facilitate mapping exercises of this type.<sup>15</sup>

We adjusted net total expenditure, by each council in each year, to 2015-16 prices using the Gross Domestic Product Price Deflator.<sup>16</sup> To account for differences in population size we used population estimates from the Office for National Statistics (ONS) to calculate a rate of expenditure per head of population aged 65 or over per year for each council area.<sup>17</sup>

In the UK and other countries, admission rates are significantly correlated with measures of social deprivation.<sup>18</sup> To control for socioeconomic deprivation, we used data from the Index of Multiple Deprivation (IMD) 2015, the official area-based measure of relative deprivation in England. We used

1  
2  
3 the Income Deprivation Affecting Older People Index (IDAOPI), a supplementary index to the overall  
4 income domain that measures the proportion of adults aged 60 or over living in income deprived  
5 households in each council area.<sup>19</sup> We grouped council-level IDAOPI scores into fifths, with the first  
6 quintile group representing the least deprived.

7  
8 Counts of deaths by age group, gender and local authority were supplied by the Office of National  
9 Statistics. Mortality rates for people aged 65 years and over were calculated by dividing the number  
10 of deaths by the population for each council and year.

### 11 12 *Statistical analyses*

13  
14 We initially investigated the unadjusted trends in the rates of emergency hospital admissions and  
15 government social care spend, in total and by council.

16  
17 We used multivariable regression analysis for panel data to assess the relation between emergency  
18 hospital admissions (response variable), and net spend on government-funded social care for older  
19 people (predictor variable). We used negative binomial regression models as these are appropriate  
20 when the outcome is a count variable.<sup>20</sup> To adjust for differences in population sizes of older people  
21 we included the size of the population aged 65 years and over as an exposure variable. Panel data  
22 models were used to help reduce the risk of omitted variable bias. Given that we were interested in  
23 the population-averaged effect, we used general estimating equations to estimate the model  
24 coefficients. Decisions relating to selecting variables and the model correlation structure were made  
25 using the quaslikelihood under the independence model criterion (QIC).<sup>21</sup>

26  
27 For each council we decomposed the variable representing government spending on social care into  
28 two new variables: a time-invariant average spend and a time-varying difference from average spend.  
29 This allowed us to assess the influence on our outcome of variation in social care spend 'within'  
30 councils (e.g. over time) and 'between' councils.

31  
32 Mortality rates among people aged 65 years and over and deprivation levels (IDAOPI quintiles) were  
33 used to control for differences in levels of population need.

34  
35 To adjust for the long-term trend in emergency hospital admissions and to control for unobserved in-  
36 year effects we included dummy variables for each year. We used robust standard errors to reflect the  
37 fact that populations were not sampled independently and to ensure that standard errors were robust  
38 to serial correlation in the data.

39  
40 Models were prepared for two outcome variables: all emergency admissions for people aged 65 and  
41 over (our primary outcome variable) and the subset of these which were for Ambulatory Care Sensitive  
42 Conditions (ACSC).

43  
44 Regression analyses were performed with Stata IC 15.1. Data preparation was done using R Statistical  
45 Software (version 3.3.2; R Foundation for Statistical Computing, Vienna, Austria).

### 46 47 *Sensitivity Analyses*

48  
49 We performed several analyses to test the sensitivity of model results to outlier values and to  
50 elements of the model specification. To test the effect of outliers on the model coefficients, we  
51 calculated dfbeta values for each council for the variable representing government spend on social  
52 care and reran the model removing those councils with the highest dfbeta values. To test the  
53 sensitivity of the results on the choice of a population-averaged modelling approach, we recreated the  
54 model using a random effects approach. To test the sensitivity of the results to lagged or leading  
55 effects of the time-varying independent variables we reran the model lagging by one year the  
56 government spend on social care (on the basis that the impact of a change in social care spend may  
57 have a delayed impact on emergency admissions), and leading by one year the mortality rate variable  
58  
59



1  
2  
3 (given that emergency admissions are known to rise exponentially for several years prior to death.<sup>22</sup>  
4 Based on QIC values, our model incorporates year as a series of 10 (T-1) dummy variables, rather than  
5 as a single linear covariate. However, to assess whether the treatment of time in our model influenced  
6 the relationship between our outcome variable and our variable of interest, we produced a version of  
7 the model which incorporated time as a linear covariate. Finally we tested the sensitivity of the model  
8 results to the specification of an independent within-group correlation structure.  
9  
10  
11  
12  
13  
14  
15  
16  
17  
18  
19  
20  
21  
22  
23  
24  
25  
26  
27  
28  
29  
30  
31  
32  
33  
34  
35  
36  
37  
38  
39  
40  
41  
42  
43  
44  
45  
46  
47  
48  
49  
50  
51  
52  
53  
54  
55  
56  
57  
58  
59  
60

## Results

### *Descriptive Analysis*

Between 2005/6 and 2015/16, the population aged 65 and over grew on average by 1.9% per annum from 7.0 million to 8.4 million (see table 1). Over the same period emergency hospital admissions of patients aged 65 and over rose by 3.0% per annum (see figure 1). Government spend on social care for this age group reduced by 0.6% per annum after adjusting for inflation (see figure 2).

*Table 1 : Trends in Admissions, Spend and Population 2005/06 to 2015/16*

| Financial Year              | Emergency Admissions 65+ | Emergency ACS Admissions 65+ | Nominal Government Net Spend on Social Care 65+ £'000s | Real Government Net Spend on Social Care 65+ £'000s | Population 65+ |
|-----------------------------|--------------------------|------------------------------|--------------------------------------------------------|-----------------------------------------------------|----------------|
| 2005/06                     | 1,567,224                | 289,869                      | 6,343,870                                              | 7,614,136                                           | 7,003,820      |
| 2006/07                     | 1,582,563                | 290,864                      | 6,431,484                                              | 7,492,147                                           | 7,033,496      |
| 2007/08                     | 1,601,874                | 294,160                      | 6,532,431                                              | 7,429,803                                           | 7,102,647      |
| 2008/09                     | 1,711,155                | 315,962                      | 6,822,653                                              | 7,554,620                                           | 7,212,610      |
| 2009/10                     | 1,778,569                | 322,447                      | 7,037,350                                              | 7,686,557                                           | 7,341,814      |
| 2010/11                     | 1,830,922                | 343,736                      | 7,088,728                                              | 7,603,647                                           | 7,480,386      |
| 2011/12                     | 1,858,048                | 353,325                      | 6,780,726                                              | 7,173,625                                           | 7,655,402      |
| 2012/13                     | 1,931,868                | 356,201                      | 6,745,162                                              | 6,989,226                                           | 7,918,734      |
| 2013/14                     | 1,961,560                | 361,803                      | 6,772,647                                              | 6,903,890                                           | 8,127,137      |
| 2014/15                     | 2,074,679                | 399,288                      | 6,914,530                                              | 6,945,018                                           | 8,312,128      |
| 2015/16                     | 2,098,280                | 409,775                      | 7,142,173                                              | 7,142,173                                           | 8,422,502      |
| Compound annual growth rate | +3.0%                    | +3.5%                        | +1.2%                                                  | -0.6%                                               | +1.9%          |

There is considerable variation between councils in the levels of spend on social care and emergency admissions per head of population (see figure 3). Rate of social care spend and emergency admissions are notably higher in the most deprived quintile.

*Figure 1 – Emergency hospital admissions aged 65+ per head of population aged 65+*

*Figure 2 – Nominal and real (inflation adjusted) Government net spend on social care for people aged 65+ (£'000s) per head of population aged 65+*

*Figure 3 : Government spend on social care (£'000s), emergency and ACS admissions per head of population (65+) by council and IDAOP (deprivation) quintile*

### Model Results

Having adjusted for the other model covariates, we found no statistically significant relationship between the rate of government spend on social care within a council and our primary outcome variable, emergency hospital admissions (IRR 1.009, 95% CI 0.965-1.056) – see table 2. Likewise we found no significant relationship with our secondary outcome, ambulatory care sensitive admissions (IRR 0.975, 95% CI 0.917-1.038) – see table 3.

Table 2: Model Results (outcome: emergency hospital admissions 65+, exposure: population aged 65+)

| Covariate              |                                                              | IRR              | p> z   | 95% Conf. Interval |       |       |
|------------------------|--------------------------------------------------------------|------------------|--------|--------------------|-------|-------|
| Time-varying effects   | Real Net Spend on Social Care (within effect) <sup>a*</sup>  | 1.009            | 0.410  | 0.965              | 1.056 |       |
|                        | Deaths**                                                     | 1.010            | <0.001 | 1.007              | 1.014 |       |
| Time invariant effects | Real Net Spend on Social Care (between effect) <sup>b*</sup> | 1.138            | <0.001 | 1.079              | 1.200 |       |
|                        | Deprivation (IDAOPI)                                         | Quintile 1 (ref) | 1.000  | -                  | -     | -     |
|                        |                                                              | Quintile 2       | 1.059  | 0.048              | 1.000 | 1.121 |
|                        |                                                              | Quintile 3       | 1.145  | <0.001             | 1.099 | 1.193 |
|                        |                                                              | Quintile 4       | 1.156  | <0.001             | 1.088 | 1.228 |
|                        |                                                              | Quintile 5       | 1.226  | <0.001             | 1.148 | 1.310 |
| Year                   | 2005/06 (ref)                                                | 1.000            | -      | -                  | -     |       |
|                        | 2006/07                                                      | 1.024            | <0.001 | 1.012              | 1.037 |       |
|                        | 2007/08                                                      | 1.034            | <0.001 | 1.021              | 1.047 |       |
|                        | 2008/09                                                      | 1.090            | <0.001 | 1.076              | 1.105 |       |
|                        | 2009/10                                                      | 1.143            | <0.001 | 1.121              | 1.165 |       |
|                        | 2010/11                                                      | 1.167            | <0.001 | 1.141              | 1.194 |       |
|                        | 2011/12                                                      | 1.179            | <0.001 | 1.148              | 1.212 |       |
|                        | 2012/13                                                      | 1.183            | <0.001 | 1.152              | 1.216 |       |
|                        | 2013/14                                                      | 1.175            | <0.001 | 1.139              | 1.211 |       |
|                        | 2014/15                                                      | 1.230            | <0.001 | 1.189              | 1.273 |       |
| 2015/16                | 1.203                                                        | <0.001           | 1.168  | 1.240              |       |       |
| Constant               |                                                              | 0.107            | <0.001 | 0.089              | 0.130 |       |

<sup>a</sup> in-year difference from average spend in the local authority between 2005/6 and 2015/16

<sup>b</sup> average spend in the local authority between 2005/6 and 2015/16

\* per head population aged 65+

\*\* per 1,000 population aged 65+

Table 3: Model Results (outcome: ACS hospital admissions 65+, exposure: population aged 65+)

| Covariate              |                                                              | IRR              | p> z   | 95% Conf. Interval |       |       |
|------------------------|--------------------------------------------------------------|------------------|--------|--------------------|-------|-------|
| Time-varying effects   | Real Net Spend on Social Care (within effect) <sup>a*</sup>  | 0.975            | 0.790  | 0.917              | 1.038 |       |
|                        | Deaths**                                                     | 1.014            | <0.001 | 1.008              | 1.019 |       |
| Time invariant effects | Real Net Spend on Social Care (between effect) <sup>b*</sup> |                  | 1.230  | <0.001             | 1.138 | 1.330 |
|                        | Deprivation (IDAOP1)                                         | Quintile 1 (ref) | 1.000  | -                  | -     | -     |
|                        |                                                              | Quintile 2       | 1.100  | 0.001              | 1.038 | 1.165 |
|                        |                                                              | Quintile 3       | 1.234  | <0.001             | 1.169 | 1.303 |
|                        |                                                              | Quintile 4       | 1.269  | <0.001             | 1.188 | 1.356 |
|                        |                                                              | Quintile 5       | 1.352  | <0.001             | 1.226 | 1.491 |
| Year                   | 2005/06 (ref)                                                |                  | 1.000  | -                  | -     | -     |
|                        | 2006/07                                                      |                  | 1.018  | 0.019              | 1.003 | 1.033 |
|                        | 2007/08                                                      |                  | 1.031  | 0.001              | 1.013 | 1.050 |
|                        | 2008/09                                                      |                  | 1.090  | <0.001             | 1.069 | 1.112 |
|                        | 2009/10                                                      |                  | 1.138  | <0.001             | 1.102 | 1.174 |
|                        | 2010/11                                                      |                  | 1.202  | <0.001             | 1.159 | 1.247 |
|                        | 2011/12                                                      |                  | 1.235  | <0.001             | 1.182 | 1.290 |
|                        | 2012/13                                                      |                  | 1.197  | <0.001             | 1.145 | 1.252 |
|                        | 2013/14                                                      |                  | 1.188  | <0.001             | 1.133 | 1.244 |
|                        | 2014/15                                                      |                  | 1.302  | <0.001             | 1.237 | 1.371 |
| 2015/16                |                                                              | 1.281            | <0.001 | 1.226              | 1.337 |       |
| Constant               |                                                              | 0.015            | <0.001 | 0.011              | 0.020 |       |

<sup>a</sup> in-year difference from average spend in the local authority between 2005/6 and 2015/16

<sup>b</sup> average spend in the local authority between 2005/6 and 2015/16

\* per head population aged 65+

\*\* per 1,000 population aged 65+

### Sensitivity Analyses

We reproduced the models excluding the nine councils with the highest dfbeta values (more than 2 standard deviations from zero) for the variable representing government spend on social care within councils. This did not alter the significance of the incident risk ratio for social care spend.

Similarly, reproducing the model with a random effects formulation did not alter the significance of the incident risk ratio for social care spend.

Lagging the variable representing government spend on social care (within councils) and leading the variable representing mortality rate by one time unit did not alter the significance of the incident risk ratio for social care spend.

1  
2  
3 When we incorporated year as a linear covariate (rather than as a set of dummy variables), the  
4 incident risk ratio increased marginally and became statistically significant.

5 The incidence risk ratio for social care spend was not materially altered when alternative within-group  
6 correlation structures (exchangeable, unstructured and autoregressive order 1) were specified.  
7

8 Supplementary file 2 contains the model coefficient and 95% confidence intervals for our variable of  
9 interest in each of the sensitivity analyses described above.  
10  
11  
12  
13  
14  
15  
16  
17  
18  
19  
20  
21  
22  
23  
24  
25  
26  
27  
28  
29  
30  
31  
32  
33  
34  
35  
36  
37  
38  
39  
40  
41  
42  
43  
44  
45  
46  
47  
48  
49  
50  
51  
52  
53  
54  
55  
56  
57  
58  
59  
60

## Discussion

### *Key findings*

Across our study population, Government spend on social care for people aged 65 and over fell by £472m (6.2%) in real terms between 2005/6 and 2015/16. We conclude that this was not associated with an increase in emergency hospital admissions. This finding is at odds with both intuition and the perceptions of those working in acute hospitals. We will explore a range of potential (and interrelated) explanations for this effect.

The prima-facie explanation for the observed results is that social care provision is not an effective means of preventing emergency hospital admissions for older people. It is likely that individuals who have been affected by reductions in social care spend to date are those whose need levels are close to eligibility thresholds and therefore have the lowest ability to benefit. It does not necessarily follow therefore that further reductions in social care spend will not result in increases in emergency hospital admissions. Moreover, our finding should not be taken as evidence of the ineffectiveness of social care in more general respects. The effectiveness of social care with respect to quality of life, for example, has been studied elsewhere and whilst this evidence base remains limited, on balance it suggests that the provision of social care leads to quality of life benefits.<sup>23</sup>

Another explanation for the findings is that social care provision may avoid hospital admissions by improving the health status of older people but that these gains are offset as social workers and social care professionals identify unmet need and trigger a healthcare intervention leading to hospital admission. These direct and countervailing effects may be reduced in tandem as social care spend is reduced. This mechanism has been proposed for other interventions that aimed, but failed to reduce emergency admissions in older people.<sup>24</sup>

A third explanation focuses on the effect of substituting government funded social care for privately funded social care and informal care. Whilst substitution may not occur in all cases, privately funded social care and informal care may be allocated more efficiently than government-funded social care, offsetting the losses associated with those individuals who now receive no care. However, the English Longitudinal Study of Ageing (ELSA) suggests that the use of privately funded social care fell between 2004/5 and 2014/15 for those reporting problems with activities of daily living (e.g. walking, bathing, dressing) and instrumental activities of daily living (e.g. cooking, shopping).<sup>25</sup>

Whilst healthcare services have been spared the severe funding cuts seen in other public services, healthcare services nonetheless report significant funding pressures. Many initiatives have sought to manage demand for emergency hospital admissions and a recent study demonstrated that thresholds for admission via emergency departments increased over the period from 2009/10 to 2014/15.<sup>26</sup> These supply constraints and changes in clinical behaviour may explain why reductions in social care spend have not resulted in increases in emergency hospital admissions.

Finally, we consider the impact of substantial funding constraints on the efficiency of social care services. To accommodate cuts in funding many social services departments have tightened need-based access criteria for services and have introduced reablement and preventative services to reduce long-term demand for care. This may have increased the efficiency of social care, improving the health status of service users and offsetting the losses to those who no longer receive government funded care. Local authorities facing the largest cuts may have undertaken the most radical redesign of services and achieved the greatest efficiency gains.

### *Limitations*

Ecological studies of this type are susceptible to a number of form of bias. However, our conservative modelling approach and the study's statistical power imply that it is extremely unlikely that reductions

1  
2  
3 in social care spend resulted in material increases in emergency admissions at a population level.  
4 None of the sensitivity analyses provided contrary evidence.

5  
6 As with all observational studies, we must consider the possibility that our observed result can be  
7 explained by the omission of a key explanatory variable. Given the use of panel data, any influential  
8 omitted variable must be a time-varying effect operating within councils, which is strongly associated  
9 with our dependant variable and our variable of interest. One candidate is household income.  
10 However, income inequality in retired households has grown since 2009/10 and over the same period  
11 councils with higher levels of deprivation have seen the greater reductions in social care spend.<sup>27</sup> We  
12 would expect these changes to amplify rather than obscure any relationship between social care  
13 spend and emergency admissions.

14  
15 Given the ecological nature of our study, we should consider the possibility that reductions in social  
16 care spend have indeed resulted in increases in emergency admissions, but that equivalent reductions  
17 in emergency hospital admissions have occurred in other groups of older people. We can think of no  
18 clear mechanism that might correspond to this theory.

19  
20 In 2014/15, the financial reporting framework used to collect data from councils on government spend  
21 on social care was substantially redesigned. The mapping of categories required to create consistent  
22 time series introduces the potential for error. However, our sensitivity analyses did not indicate that  
23 the results were substantially affected by the presence of outliers.

#### 24 25 *Relation to Existing Literature*

26  
27 Unlike our study, the small number of previous studies which have explored the relationship between  
28 social spend or provision and healthcare use have found evidence of a substitution effect. A cross-  
29 sectional analysis using small area data found the cost effects of a transfer of resources from hospitals  
30 to care homes were broadly neutral, but this study pre-dates the recent significant reductions in social  
31 care expenditure.<sup>8</sup> A later study using panel data found delayed discharges from hospitals responded,  
32 if only weakly, to increases in the supply of care home beds.<sup>9</sup> A Norwegian study, using patient level  
33 data, reported that after controlling for casemix, hospital, and time fixed effects, higher levels of social  
34 care capacity were associated with reduced hospital length of stay.<sup>10</sup> A 2012 study demonstrated  
35 interactions in the use of hospital care and social care for older people and that residents of care  
36 homes tended to use hospitals less frequently than people receiving home care.<sup>28</sup>

#### 37 38 39 *Implications for Policy and Research*

40  
41 We recommend further work on this subject to verify or rebut our results, to test the credibility of the  
42 mechanisms we have proposed to explain our results or to identify and test alternative mechanisms.  
43 We have made the panel dataset available with this paper to allow others to replicate the study's  
44 methods and explore alternative approaches to test the relationship between emergency hospital  
45 admissions and spend on social care.

46  
47 Policy makers should review schemes, such as the Better Care Fund, which are predicated on the belief  
48 that emergency hospital admissions can be reduced by increasing social care provision. Our analysis  
49 suggests that this approach is unlikely to succeed. Healthcare commissioners should consider  
50 alternative, evidence-based methods of moderating demand for emergency hospital care.

51  
52 We note that the NHS's latest social care funding initiative, the Improved Better Care Fund (iBCF), aims  
53 to reduce hospital length of stay and delayed transfers of care rather than prevent emergency  
54 admissions. Further research should be carried out to test the limited evidence supporting this  
55 approach.

**Conclusion**

We found no evidence to support the view that reductions in government spend on social care since 2008 have led to increases in emergency hospital admissions in older people.

For peer review only



### *Contribution Statement*

Paul Seamer, Prof Simon Brake and Steven Wyatt conceived the research. Paul Seamer assembled the data. Paul Seamer and Steven Wyatt conducted the analysis and drafted the manuscript. Dr. Patrick Moore and Prof. Mohammed Mohammed offered advice on the selection of statistical model and reviewed the analysis. Prof. Brake framed the analysis within a policy context. All authors reviewed and commented on the draft manuscripts.

### *Conflicts of Interest*

SB is employed by NHS Walsall CCG which jointly commissions social care services for older people through the Better Care Fund. SB was previously employed by Coventry City Council, a commissioner and provider of social care for older people.

The authors have no other relationships or activities that could appear to have influenced the submitted work.

### *Copyright, open access and permission to reuse*

The Corresponding Author has the right to grant on behalf of all authors and does grant on behalf of all authors, a worldwide licence (<http://www.bmj.com/sites/default/files/BMJ%20Author%20Licence%20March%202013.doc>) to the Publishers and its licensees in perpetuity, in all forms, formats and media (whether known now or created in the future), to i) publish, reproduce, distribute, display and store the Contribution, ii) translate the Contribution into other languages, create adaptations, reprints, include within collections and create summaries, extracts and/or, abstracts of the Contribution and convert or allow conversion into any format including without limitation audio, iii) create any other derivative work(s) based in whole or part on the on the Contribution, iv) to exploit all subsidiary rights to exploit all subsidiary rights that currently exist or as may exist in the future in the Contribution, v) the inclusion of electronic links from the Contribution to third party material where-ever it may be located; and, vi) licence any third party to do any or all of the above. All research articles will be made available on an Open Access basis (with authors being asked to pay an open access fee—see <http://www.bmj.com/about-bmj/resources-authors/forms-policies-and-checklists/copyright-open-access-and-permission-reuse>). The terms of such Open Access shall be governed by a Creative Commons licence—details as to which Creative Commons licence will apply to the research article are set out in our worldwide licence referred to above.

### *Transparency declaration*

Paul Seamer, the lead author, affirms that the manuscript is an honest, accurate, and transparent account of the study being reported; that no important aspects of the study have been omitted.

1  
2  
3 *Ethics approval*

4 Ethics approval was not required. The research used historical anonymised data and did not influence  
5 patient care.  
6  
7  
8

9  
10 *Patient and Public Involvement*

11 Patients and member of the public were not involved in the design of this study.  
12  
13

14  
15 *Funding Statement*

16  
17 NHS Midlands and Lancashire Commissioning Support Unit received payment from NHS Coventry and  
18 Rugby Clinical Commissioning Group to conduct the initial analysis that led to this paper.  
19  
20

21  
22 *Data Sharing Statement*

23  
24 We propose to make the panel dataset available with this paper to allow others to replicate the  
25 study's methods and explore alternative approaches to test the relationship between emergency  
26 hospital admissions and spend on social care.  
27  
28  
29  
30  
31  
32  
33  
34  
35  
36  
37  
38  
39  
40  
41  
42  
43  
44  
45  
46  
47  
48  
49  
50  
51  
52  
53  
54  
55  
56  
57  
58  
59  
60

## References

- 1 Institute of Fiscal Studies & Nuffield Foundation, Central Cuts, Local Decision-Making: Changes in Local Government Spending and Revenues in England, 2009-10 to 2014-15, 2015 (<https://www.ifs.org.uk/uploads/publications/bns/BN166.pdf>)
- 2 NHS Digital, Community Care Statistics, Referrals, assessments and packages of care for adults - England, 2007-2008, National summary, 18 December 2008 (<https://digital.nhs.uk/catalogue/PUB01519>)
- 3 NHS Digital, Community Care Statistics, Social Services Activity, England - 2013-14, Final release (<https://digital.nhs.uk/catalogue/PUB16133>)
- 4 NHS Digital, Hospital Accident and Emergency Activity, 2016-17, October 2017, (<https://digital.nhs.uk/catalogue/PUB30112>)
- 5 Office of National Statistics, National Population Projections 2016, 2018 (<https://www.ons.gov.uk/peoplepopulationandcommunity/populationandmigration/populationprojections/bulletins/nationalpopulationprojections/2016basedstatisticalbulletin> )
- 6 Kings Fund, Quarterly Monitoring Report 1, October 2015 (<https://qmr.kingsfund.org.uk/2015/17/> )
- 7 Thorlby R, Fact of Fiction? Social care cuts are to blame for the 'crisis' in hospital emergency departments, Nuffield Trust comment, 29 January 2015 (<https://www.nuffieldtrust.org.uk/news-item/fact-or-fiction-social-care-cuts-are-to-blame-for-the-crisis-in-hospital-emergency-departments#fact-or-fiction> )
- 8 Forder J, Long-term care and hospital utilisation by older people: an analysis of substitution rates, Health Economics doi 10.1002/hec.14382009 , February 2009 (<http://onlinelibrary.wiley.com/doi/10.1002/hec.1438/abstract>)
- 9 Gaughan J, Gravelle H, Siciliani L, Testing the Bed-Blocking Hypothesis: Does Nursing and Care Home Supply Reduce Delayed Hospital Discharges?, Health Economics 10.1002/hec.3150 2March 2015 (<http://onlinelibrary.wiley.com/doi/10.1002/hec.3150/full>)
- 10 Holmas T, Islam M, Kjerstad E, Interdependency between social care and hospital care: the case of hospital length of stay, European Journal of Public Health Volume 23, Issue 6, Pages 927–93, December 2013 <https://academic.oup.com/eurpub/article/23/6/927/434760/Interdependency-between-social-care-and-hospital>)
- 11 Curry N, Ham C, Clinical and service integration, 2010 (<https://www.kingsfund.org.uk/sites/default/files/Clinical-and-service-integration-Natasha-Curry-Chris-Ham-22-November-2010.pdf> )
- 12 Department of Communities and Local Government & Department of Health, Integration and Better Care Fund planning requirements for 2017-19, (<https://www.england.nhs.uk/wp-content/uploads/2017/07/integration-better-care-fund-planning-requirements.pdf> )
- 13 NHS Digital, HES Data Dictionary – Admitted Patient Care, September 2017 (<http://content.digital.nhs.uk/media/25188/DD-APC-V10/pdf/DD-APC-V10.pdf> )
- 14 Purdy S, Griffin T, Salisbury C, Sharp D, Ambulatory care sensitive conditions: terminology and disease coding need to be more specific to aid policy makers and clinicians, Public Health. 2009 Feb;123(2):169-73. , 2010 (<https://www.ncbi.nlm.nih.gov/pubmed/19144363> )
- 15 NHS Digital, Adult Social Care Finance Return (ASC-FR) Guidance For the collection period 1 April 2015 – 31 March 2016, September 2015 ([http://content.digital.nhs.uk/media/16585/ASC-FR-Guidance-201516/pdf/ASC-FR\\_Guidance\\_2015-16\\_v1.1.pdf](http://content.digital.nhs.uk/media/16585/ASC-FR-Guidance-201516/pdf/ASC-FR_Guidance_2015-16_v1.1.pdf) )
- 16 HM Treasury, GDP deflators at market prices and money GDP, 28 November 2017 (<https://www.gov.uk/government/statistics/gdp-deflators-at-market-prices-and-money-gdp-november-2017-autumn-budget-2017> )
- 17 Office of National Statistics, Lower Super Output Area Mid-Year Population Estimates, 26 October 2017 (<https://www.ons.gov.uk/peoplepopulationandcommunity/populationandmigration/populationestimates/datasets/lowersuperoutputareamidyearpopulationestimates> )

- 1  
2  
3
- 
- 4 <sup>18</sup> Majeed A, Bardsley M, Morgan D, O'sullivan C, Bindman A, Cross sectional study of primary care  
5 groups in London: association of measures of socioeconomic and health status with hospital  
6 admission rates, *BMJ* 2000;321:1057, 28 October 2000  
7 (<http://www.bmj.com/content/321/7268/1057.short> )
- 8 <sup>19</sup> Department of Communities and Local Government, English Indices of Deprivation, 30 September  
9 2015 (<https://www.gov.uk/government/statistics/english-indices-of-deprivation-2015> )
- 10 <sup>20</sup> Hilbe JM, Negative Binomial regression, Cambridge University Press, 2011
- 11 <sup>21</sup> Cui J, QIC program and model selection in GEE analyses, *The Stata Journal* Volume 7 Number 2: pp.  
12 209-220, 2007 (<http://www.stata-journal.com/article.html?article=st0126> )
- 13 <sup>22</sup> Seshamani M, Gray A, A longitudinal study of the effects of age and time to death on hospital costs,  
14 *J Health Econ.* 2004 Mar;23(2):217-35, 2004 (<https://www.ncbi.nlm.nih.gov/pubmed/15019753> )
- 15 <sup>23</sup> Sutcliffe K, Rees R, Dickson K, Hargreaves K, Schucan-Bird K, Kwan I, Kavanagh J (all EPPI-Centre),  
16 Woodman J Gibson K, 2012, The adult social care outcomes framework: A systematic review of  
17 systematic reviews to support its use and development, December 2013  
18 (<https://eppi.ioe.ac.uk/cms/Portals/0/PDF%20reviews%20and%20summaries/ASCOF%202012Sutcliffe%20report.pdf?ver=2013-11-14-144947-670> )
- 19 <sup>24</sup> Steventon A, Bardsley M, Billings J, Georghiou T, Lewis G, An evaluation of the impact of  
20 community-based interventions on hospital use, March 2011,  
21 (<https://www.nuffieldtrust.org.uk/research/an-evaluation-of-the-impact-of-community-based-interventions-on-hospital-use> )
- 22 <sup>25</sup> English Longitudinal Study of Ageing (<https://www.elsa-project.ac.uk/about-ELSA> )
- 23 <sup>26</sup> Wyatt S, Child K, Hood A, Cooke M, Mohammed M, Changes in admission thresholds in English  
24 emergency department, *Emerg Med J.* doi: 10.1136/emered-2016-206213, 12 September 2017  
25 (<http://emj.bmj.com/content/early/2017/09/12/emered-2016-206213> )
- 26 <sup>27</sup> Office of National statistics , Household disposable income and inequality in the UK: financial year  
27 ending 2016, 10 January 2017  
28 (<https://www.ons.gov.uk/peoplepopulationandcommunity/personalandhouseholdfinances/incomeandwealth/bulletins/householddisposableincomeandinequality/financialyearending2016> )
- 29 <sup>28</sup> Bardsley M, Georghiou T, Chassin L, Overlap of hospital use and social care in older people in  
30 England, *Journal of Health Services Research and policy* Volume: 17 issue: 3, page(s): 133-139, July  
31 2012 (<http://journals.sagepub.com/doi/abs/10.1258/JHSRP.2011.010171> )
- 32  
33  
34  
35  
36  
37  
38  
39  
40  
41  
42  
43  
44  
45  
46  
47  
48  
49  
50  
51  
52  
53  
54  
55  
56  
57  
58  
59  
60

1  
2  
3  
4  
5  
6  
7  
8  
9  
10  
11  
12  
13  
14  
15  
16  
17  
18  
19  
20  
21  
22  
23  
24  
25  
26  
27  
28  
29  
30  
31  
32  
33  
34  
35  
36  
37  
38  
39  
40  
41  
42  
43  
44  
45  
46  
47  
48  
49  
50  
51  
52  
53  
54  
55  
56  
57  
58  
59  
60

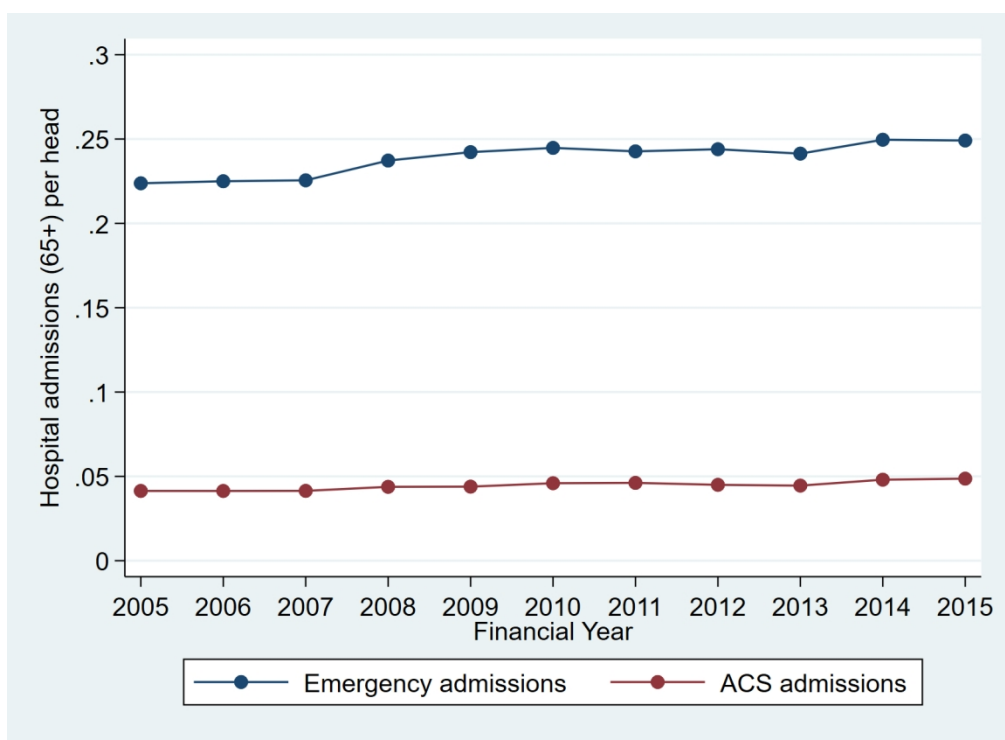

Figure 1 – Emergency hospital admissions aged 65+ per head of population aged 65+  
139x101mm (300 x 300 DPI)

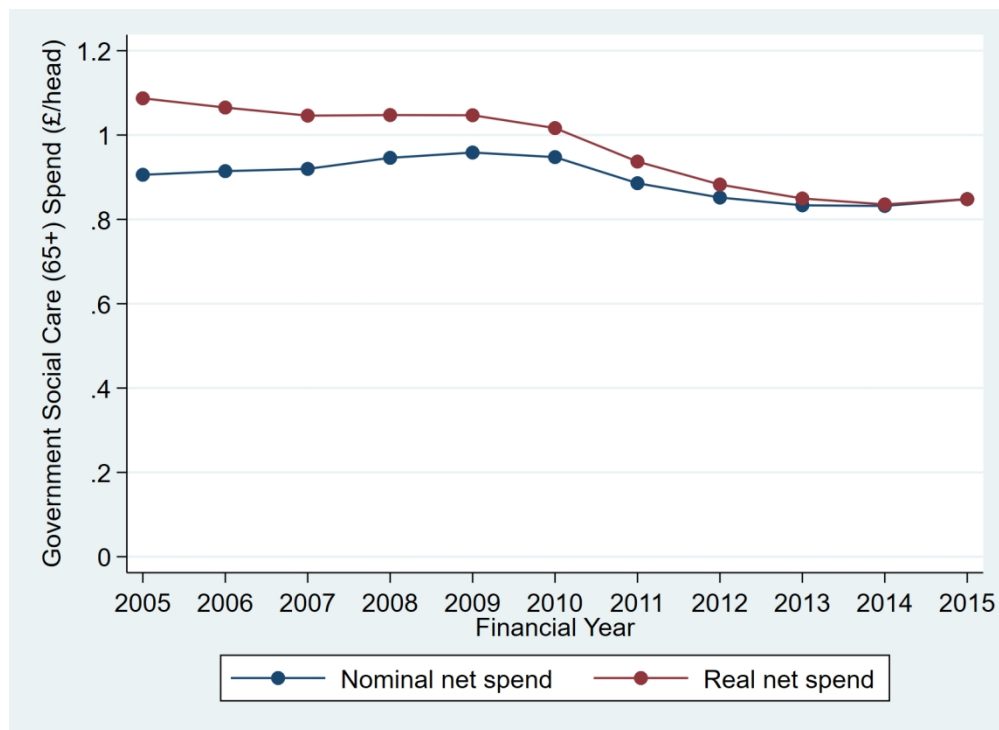

Figure 2 – Nominal and real (inflation adjusted) Government net spend on social care for people aged 65+ (£'000s) per head of population aged 65+

139x101mm (300 x 300 DPI)

1  
2  
3  
4  
5  
6  
7  
8  
9  
10  
11  
12  
13  
14  
15  
16  
17  
18  
19  
20  
21  
22  
23  
24  
25  
26  
27  
28  
29  
30  
31  
32  
33  
34  
35  
36  
37  
38  
39  
40  
41  
42  
43  
44  
45  
46  
47  
48  
49  
50  
51  
52  
53  
54  
55  
56  
57  
58  
59  
60

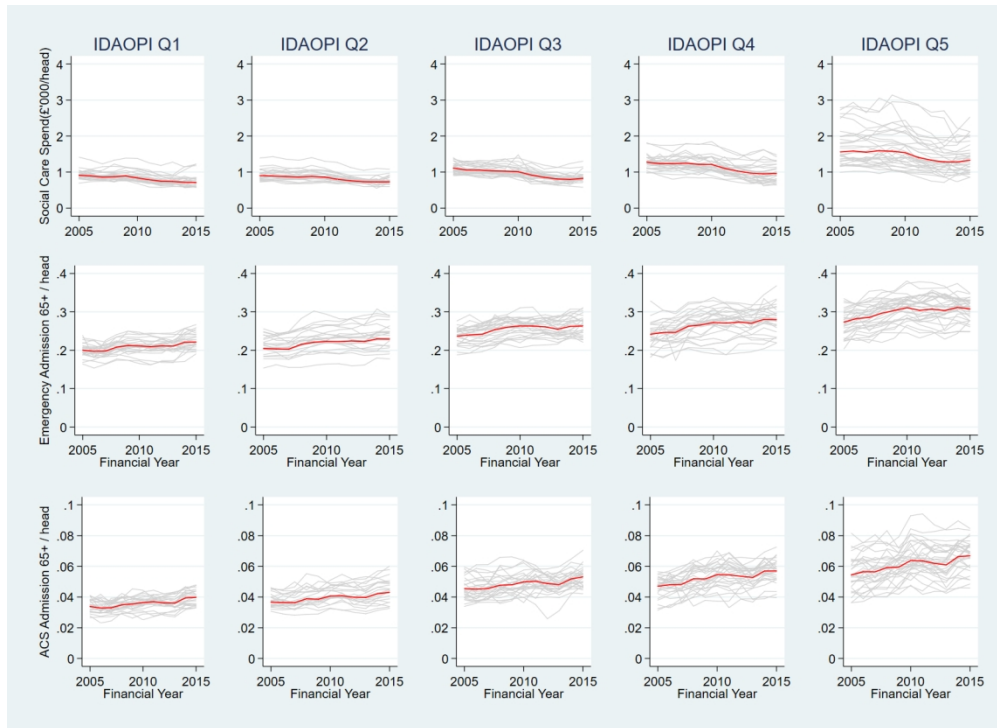

Figure 3 : Government spend on social care (£'000s), emergency and ACS admissions per head of population (65+) by council and IDAOPI (deprivation) quintile

139x101mm (300 x 300 DPI)

**Supplementary File 1 – Councils with Responsibility for Social Services Excluded from Analysis**

*Established following structural changes to local government in April 2009 (n=9)*

County Durham

Shropshire

Cornwall

Wiltshire

Northumberland

Cheshire East

Cheshire West & Chester

Bedford

Central Bedfordshire

*Missing social care spend data in one or more years (n=3)*

Thurrock

Surrey

East Sussex

*Small population (n=3)*

The City of London

The Isles of Scilly

Rutland

*>50% year-on-year change in emergency hospital admissions in one or more years (n=5)*

Milton Keynes

Barnet

Enfield

Hounslow

Isle of Wight



## Supplementary File 2 – Results of Sensitivity Analyses

Coefficient for government spend on Social Care (within effect); outcome variable emergency admissions for patients aged 65+

|                                                            | IRR   | p> z | 95% Conf. Interval |       |
|------------------------------------------------------------|-------|------|--------------------|-------|
| Primary Analysis                                           | 1.009 | 0.41 | 0.965              | 1.056 |
| Sensitivity Analyses                                       |       |      |                    |       |
| 1 : Excluding councils with highest dfbeta values          | 0.996 | 0.82 | 0.963              | 1.030 |
| 2 : Random effects formulation                             | 1.020 | 0.15 | 0.993              | 1.049 |
| 3 : Lagging spend on social care & leading mortality rates | 1.035 | 0.25 | 0.976              | 1.099 |
| 4 : Treat year as linear covariate                         | 1.052 | 0.02 | 1.009              | 1.097 |
| 5a : Correlation structure - exchangeable                  | 1.023 | 0.99 | 0.978              | 1.069 |
| 5b : Correlation structure - unstructured                  | 1.015 | 1.00 | 0.986              | 1.044 |
| 5c : Correlation structure – autoregressive (order1)       | 1.008 | 0.61 | 0.982              | 1.036 |

**STROBE 2007 (v4) checklist of items to be included in reports of observational studies in epidemiology\***  
**Checklist for cohort, case-control, and cross-sectional studies (combined)**

| Section/Topic             | Item # | Recommendation                                                                                                                                                                                                                                                                                                                                                                                                                                                         | Reported on page # |
|---------------------------|--------|------------------------------------------------------------------------------------------------------------------------------------------------------------------------------------------------------------------------------------------------------------------------------------------------------------------------------------------------------------------------------------------------------------------------------------------------------------------------|--------------------|
| Title and abstract        | 1      | (a) Indicate the study's design with a commonly used term in the title or the abstract                                                                                                                                                                                                                                                                                                                                                                                 | 2                  |
|                           |        | (b) Provide in the abstract an informative and balanced summary of what was done and what was found                                                                                                                                                                                                                                                                                                                                                                    | 2                  |
| <b>Introduction</b>       |        |                                                                                                                                                                                                                                                                                                                                                                                                                                                                        |                    |
| Background/rationale      | 2      | Explain the scientific background and rationale for the investigation being reported                                                                                                                                                                                                                                                                                                                                                                                   | 3                  |
| Objectives                | 3      | State specific objectives, including any pre-specified hypotheses                                                                                                                                                                                                                                                                                                                                                                                                      | 3                  |
| <b>Methods</b>            |        |                                                                                                                                                                                                                                                                                                                                                                                                                                                                        |                    |
| Study design              | 4      | Present key elements of study design early in the paper                                                                                                                                                                                                                                                                                                                                                                                                                | 4                  |
| Setting                   | 5      | Describe the setting, locations, and relevant dates, including periods of recruitment, exposure, follow-up, and data collection                                                                                                                                                                                                                                                                                                                                        | 4                  |
| Participants              | 6      | (a) <i>Cohort study</i> —Give the eligibility criteria, and the sources and methods of selection of participants. Describe methods of follow-up<br><i>Case-control study</i> —Give the eligibility criteria, and the sources and methods of case ascertainment and control selection. Give the rationale for the choice of cases and controls<br><i>Cross-sectional study</i> —Give the eligibility criteria, and the sources and methods of selection of participants | 4                  |
|                           |        | (b) <i>Cohort study</i> —For matched studies, give matching criteria and number of exposed and unexposed<br><i>Case-control study</i> —For matched studies, give matching criteria and the number of controls per case                                                                                                                                                                                                                                                 |                    |
| Variables                 | 7      | Clearly define all outcomes, exposures, predictors, potential confounders, and effect modifiers. Give diagnostic criteria, if applicable                                                                                                                                                                                                                                                                                                                               | 4,5                |
| Data sources/ measurement | 8*     | For each variable of interest, give sources of data and details of methods of assessment (measurement). Describe comparability of assessment methods if there is more than one group                                                                                                                                                                                                                                                                                   | 4,5                |
| Bias                      | 9      | Describe any efforts to address potential sources of bias                                                                                                                                                                                                                                                                                                                                                                                                              | 4,5                |
| Study size                | 10     | Explain how the study size was arrived at                                                                                                                                                                                                                                                                                                                                                                                                                              | 4                  |
| Quantitative variables    | 11     | Explain how quantitative variables were handled in the analyses. If applicable, describe which groupings were chosen and why                                                                                                                                                                                                                                                                                                                                           | 4,5                |
| Statistical methods       | 12     | (a) Describe all statistical methods, including those used to control for confounding                                                                                                                                                                                                                                                                                                                                                                                  | 5, 6               |
|                           |        | (b) Describe any methods used to examine subgroups and interactions                                                                                                                                                                                                                                                                                                                                                                                                    | 5,6                |
|                           |        | (c) Explain how missing data were addressed                                                                                                                                                                                                                                                                                                                                                                                                                            | 4,5,6              |
|                           |        | (d) <i>Cohort study</i> —If applicable, explain how loss to follow-up was addressed<br><i>Case-control study</i> —If applicable, explain how matching of cases and controls was addressed                                                                                                                                                                                                                                                                              | 4                  |

|                          |     |                                                                                                                                                                                                              |                            |
|--------------------------|-----|--------------------------------------------------------------------------------------------------------------------------------------------------------------------------------------------------------------|----------------------------|
|                          |     | <i>Cross-sectional study</i> —If applicable, describe analytical methods taking account of sampling strategy                                                                                                 |                            |
|                          |     | (e) Describe any sensitivity analyses                                                                                                                                                                        | 5,6                        |
| <b>Results</b>           |     |                                                                                                                                                                                                              |                            |
| Participants             | 13* | (a) Report numbers of individuals at each stage of study—eg numbers potentially eligible, examined for eligibility, confirmed eligible, included in the study, completing follow-up, and analysed            | 4                          |
|                          |     | (b) Give reasons for non-participation at each stage                                                                                                                                                         | 4                          |
|                          |     | (c) Consider use of a flow diagram                                                                                                                                                                           | n/a                        |
| Descriptive data         | 14* | (a) Give characteristics of study participants (eg demographic, clinical, social) and information on exposures and potential confounders                                                                     |                            |
|                          |     | (b) Indicate number of participants with missing data for each variable of interest                                                                                                                          | 4, 7, supplementary file 2 |
|                          |     | (c) <i>Cohort study</i> —Summarise follow-up time (eg, average and total amount)                                                                                                                             | 4                          |
| Outcome data             | 15* | <i>Cohort study</i> —Report numbers of outcome events or summary measures over time                                                                                                                          | 7                          |
|                          |     | <i>Case-control study</i> —Report numbers in each exposure category, or summary measures of exposure                                                                                                         |                            |
|                          |     | <i>Cross-sectional study</i> —Report numbers of outcome events or summary measures                                                                                                                           | 7                          |
| Main results             | 16  | (a) Give unadjusted estimates and, if applicable, confounder-adjusted estimates and their precision (eg, 95% confidence interval). Make clear which confounders were adjusted for and why they were included | 8, 9                       |
|                          |     | (b) Report category boundaries when continuous variables were categorized                                                                                                                                    | 4                          |
|                          |     | (c) If relevant, consider translating estimates of relative risk into absolute risk for a meaningful time period                                                                                             | n/a                        |
| Other analyses           | 17  | Report other analyses done—eg analyses of subgroups and interactions, and sensitivity analyses                                                                                                               | 9,10                       |
| <b>Discussion</b>        |     |                                                                                                                                                                                                              |                            |
| Key results              | 18  | Summarise key results with reference to study objectives                                                                                                                                                     | 10                         |
| Limitations              | 19  | Discuss limitations of the study, taking into account sources of potential bias or imprecision. Discuss both direction and magnitude of any potential bias                                                   | 10,11                      |
| Interpretation           | 20  | Give a cautious overall interpretation of results considering objectives, limitations, multiplicity of analyses, results from similar studies, and other relevant evidence                                   | 13                         |
| Generalisability         | 21  | Discuss the generalisability (external validity) of the study results                                                                                                                                        | 12                         |
| <b>Other information</b> |     |                                                                                                                                                                                                              |                            |
| Funding                  | 22  | Give the source of funding and the role of the funders for the present study and, if applicable, for the original study on which the present article is based                                                | 14                         |

\*Give information separately for cases and controls in case-control studies and, if applicable, for exposed and unexposed groups in cohort and cross-sectional studies.

1  
2 **Note:** An Explanation and Elaboration article discusses each checklist item and gives methodological background and published examples of transparent reporting. The STROBE  
3 checklist is best used in conjunction with this article (freely available on the Web sites of PLoS Medicine at <http://www.plosmedicine.org/>, Annals of Internal Medicine at  
4 <http://www.annals.org/>, and Epidemiology at <http://www.epidem.com/>). Information on the STROBE Initiative is available at [www.strobe-statement.org](http://www.strobe-statement.org).  
5  
6  
7  
8  
9  
10  
11  
12  
13  
14  
15  
16  
17  
18  
19  
20  
21  
22  
23  
24  
25  
26  
27  
28  
29  
30  
31  
32  
33  
34  
35  
36  
37  
38  
39  
40  
41  
42  
43  
44  
45  
46

For peer review only

# BMJ Open

## Did Government Spending Cuts to Social Care for Older People Lead to an Increase in Emergency Hospital Admissions? An Ecological Study; England 2005 to 2016

|                                 |                                                                                                                                                                                                                                                                                                                                                                                                                                                          |
|---------------------------------|----------------------------------------------------------------------------------------------------------------------------------------------------------------------------------------------------------------------------------------------------------------------------------------------------------------------------------------------------------------------------------------------------------------------------------------------------------|
| Journal:                        | <i>BMJ Open</i>                                                                                                                                                                                                                                                                                                                                                                                                                                          |
| Manuscript ID                   | bmjopen-2018-024577.R1                                                                                                                                                                                                                                                                                                                                                                                                                                   |
| Article Type:                   | Research                                                                                                                                                                                                                                                                                                                                                                                                                                                 |
| Date Submitted by the Author:   | 11-Jan-2019                                                                                                                                                                                                                                                                                                                                                                                                                                              |
| Complete List of Authors:       | Seamer, Paul; NHS Midlands and Lancashire Commissioning Support Unit, The Strategy Unit<br>Brake, Simon; University of Warwick, Warwick Medical School; NHS Walsall Clinical Commissioning Group<br>Moore, Patrick; University of Birmingham, Institute of Applied Health Research<br>Mohammed, Mohammed ; University of Bradford, Faculty of Health Studies<br>Wyatt, Steven; NHS Midlands and Lancashire Commissioning Support Unit, The Strategy Unit |
| <b>Primary Subject Heading</b>: | Health policy                                                                                                                                                                                                                                                                                                                                                                                                                                            |
| Secondary Subject Heading:      | Health economics, Health services research                                                                                                                                                                                                                                                                                                                                                                                                               |
| Keywords:                       | social care, emergency hospital admissions, older people, government spending                                                                                                                                                                                                                                                                                                                                                                            |
|                                 |                                                                                                                                                                                                                                                                                                                                                                                                                                                          |

SCHOLARONE™  
Manuscripts

1  
2  
3  
4  
5 **Did Government Spending Cuts to Social Care for Older People Lead to an Increase in**  
6 **Emergency Hospital Admissions? An Ecological Study; England 2005 to 2016**  
7  
8  
9  
10  
11  
12

13 **Paul Seamer**

14 The Strategy Unit, NHS Midlands and Lancashire Commissioning Support Unit  
15 West Bromwich, West Midlands UK  
16

17 **Prof. Simon Brake**

18 Warwick Medical School, University of Warwick  
19 Coventry, West Midlands, UK  
20

21 **Dr. Patrick Moore**

22 Institute of Applied Health Research, University of Birmingham  
23 Birmingham, West Midlands, UK  
24

25 **Prof. Mohammed Mohammed**

26 Faculty of Health Studies, University of Bradford  
27 Bradford, West Yorkshire, UK  
28  
29

30 **Steven Wyatt (corresponding author)**

31 The Strategy Unit, NHS Midlands and Lancashire Commissioning Support Unit  
32 Postal address: Kingston House, 438-450 High Street, West Bromwich, West Midlands, B70 9LD, UK  
33 Email: [swyatt@nhs.net](mailto:swyatt@nhs.net)  
34 Telephone: 0121 612 3872  
35  
36  
37  
38  
39

40 **Word count** : 4,987 words  
41  
42  
43  
44  
45  
46  
47  
48  
49  
50  
51  
52  
53  
54  
55  
56  
57  
58  
59  
60

## Abstract

**Objectives:** Government spending on social care in England reduced substantially in real terms following the economic crisis in 2008, meanwhile emergency admissions to hospitals have increased. We aimed to assess the extent to which reductions in social care spend on older people have led to increases in emergency hospital admissions.

**Design:** We used negative binomial regression for panel data to assess the relationship between emergency hospital admissions and government spend on social care for older people. We adjusted for population size and for levels of deprivation and health.

**Setting:** Hospitals and adult social care services in England between April 2005 And March 2016.

**Participants:** People aged 65 years and over resident in 132 local councils.

**Outcome measures:** Primary outcome variable - emergency hospital admissions of adults aged 65 years and over. Secondary outcome measure - emergency hospital admissions for ambulatory care sensitive conditions of adults aged 65 years and over.

**Results:** We found no significant relationship between the changes in the rate of government spend (£'000s) on social care for older people within councils and our primary outcome variable, emergency hospital admissions (IRR 1.009, 95% CI 0.965-1.056) or our secondary outcome measure, admissions for ambulatory care sensitive conditions (IRR 0.975, 95% CI 0.917-1.038).

**Conclusions:** We found no evidence to support the view that reductions in government spend on social care since 2008 have led to increases in emergency hospital admissions in older people. Policy makers may wish to review schemes, such as the Better Care Fund, which are predicated on a relationship between social care provision and emergency hospital admissions of older people.

### Strengths and limitations of this study

- This study explores the relationship between government spending on social care and emergency hospital admissions across a large area (132 councils) and a long period (10 years).
- The study includes a period of time when reductions in government spending on social care were large on average and variable between councils, increasing the opportunity to detect an impact on emergency hospital admissions.
- The study used panel data methods which help reduce the risk of omitted variable bias.
- Changes in the way councils record expenditure may have obscured the relationship with emergency hospital admissions.
- Sensitivity analysis was used to explore the possibility that the results are a function of the influential outliers or the choice of analytical method.

## Introduction

The economic crisis beginning in 2008 caused many countries to cut public sector expenditure on health care. Successive governments in England have sought to maintain health spending by imposing a “ring fence”. However central government grants to local councils, who are responsible for funding social care have been reduced.<sup>1</sup> The term ‘social care’ is used to describe a range of support services which help people carry out daily living tasks and therefore live independently. This can include help with washing, dressing, cooking, cleaning, getting in and out of bed as well as fitting adaptations such as stairlifts, handrails and bath seats. Social care can be delivered within an individual’s private residence or as part of a placement in a care home or supported living scheme. Unlike health care, which is largely provided free at the point of use, social care for older people in England is means-tested and the majority of recipients will be expected to contribute towards the cost of their care. The numbers of older people receiving government-funded social care fell by 40% between March 2008 and March 2014 whilst the population aged 65+ years increased by 15%.<sup>2,3</sup> While some people who are no longer supported by the state might choose to pay for care privately or to rely on informal care, others may have to just make do with less social care support.

Meanwhile demand for urgent and emergency care is rising. The number of people aged 65+ years attending Accident and Emergency departments in England rose by 64% between 2008 and 2015.<sup>4</sup> Looking forward, the number of people aged 65+ year is expected to grow from 9.9 million in 2016 to over 12 million by 2028.<sup>5</sup> There is growing concern that under-supply of social care is increasing pressures on urgent and emergency care by leaving older people at greater risk of hospital admission and delaying their discharge from hospital. Nearly nine out of ten NHS hospital finance directors believe that funding pressures on councils have had a negative impact on the performance of health services in their local area.<sup>6</sup>

Much of the evidence supporting this claim, however, is anecdotal. The effect of reductions in social care on the health and well-being of older people, and in particular their use of emergency healthcare services has not been quantified.<sup>7</sup> A small number of studies in European countries have found evidence of a trade-off between the number of hospital beds and the level of social care provision.<sup>8,9,10</sup> The reported effect, however, was relatively small; and the research mostly focused on long-term residential care and/or hospital length of stay, and pre-dates the most significant reductions in social care expenditure.

Many health systems are exploring the benefits of greater integration between health and care services.<sup>11</sup> In England, the current government’s policy is predicated on the view that closer working between health and social care will ease pressure on emergency services. For example, the Better Care Fund, worth a minimum of £3.9 billion in 2016–17, is for joint projects between local government and the NHS.<sup>12</sup> The broad intention is to shift resources from the NHS into social care and community services by keeping patients out of hospitals, but much of the required investment will only become available if savings can be made from avoiding unplanned admissions to hospital or reducing length of stay.

The aim of this study is to determine the extent to which reductions in government spending on social care for older adults, following the economic crisis, have led to increases in emergency admissions to hospitals.



## Methods

### *Setting and study population*

Our analysis focused on local government councils with responsibility for providing adult social care services in England between 2005-06 and 2015-16. In 2015-16 there were 152 English councils with responsibility for providing adult social care services. Nine of these councils were only established following structural changes to local government in April 2009. These areas were excluded from all analyses. A further three councils were missing spend data for at least one year, these areas were also excluded. The City of London, the Isles of Scilly, and Rutland were excluded because we expected their small populations would cause instability. We excluded a further 5 councils that reported a year-on-year change in emergency hospital admissions for older people of more than 50% in one or more years between 2005/6 and 2015/16 on the basis that these jumps are implausible and are more likely to represent data errors. This left a balanced panel dataset of 1452 observations (N = 132, T = 11). The list of the councils excluded from the analysis is provided in supplementary file 1.

### *Data sources*

The data used in this study were collected from a number of national information systems. The main outcome variable in our analysis is counts of emergency admissions to hospitals (admissions that happen at short notice because of perceived clinical need) by people aged 65 years and over in each council area. We obtained this information from the Hospital Episode Statistics (HES) dataset. HES contains records of all admissions for patients admitted to NHS hospitals, and includes information on method of admission (e.g. emergency), diagnosis codes recording the primary reason the patient is being treated, and any secondary diagnoses relevant to their care.<sup>13</sup> We hypothesised that some types of admission are more likely to be avoidable by timely access to social care. Ambulatory care sensitive conditions (ACSCs) are a well-defined set of conditions where effective community care and case management can help prevent the need for hospital admission.<sup>14</sup> Counts of emergency hospital admissions of people aged 65 and over for ACSC conditions were derived from HES and used as a secondary outcome measure.

Our main exposure variable was government spending on social care. We obtained financial data relating to publicly-funded social care for older people (those aged 65+ years) from administrative returns provided to central government by the social services departments of councils providing adult social care services in England. Publicly-funded social care in England is targeted at those with the highest needs and lowest incomes. Older people who meet needs-based eligibility criteria but whose income and assets are above a set amount are required to contribute a proportion of the cost themselves, and some with needs receive no financial support. We calculated a series for councils' net expenditure by subtracting contributions paid by service users for their care from councils' gross total expenditure on services for older people. These expenditure levels include income from the NHS through schemes such as the Better Care Fund.

In 2014-15, there were changes to the financial reporting framework used by councils to collect these data that meant we needed to 'map' categories of council income across the two frameworks to obtain a consistent series on councils' income from client contributions. Bridging files were published by NHS Digital to facilitate mapping exercises of this type.<sup>15</sup>

We adjusted net total expenditure, by each council in each year, to 2015-16 prices using the Gross Domestic Product Price Deflator.<sup>16</sup> To account for differences in population size we used population estimates from the Office for National Statistics (ONS) to calculate a rate of expenditure per head of population aged 65 or over per year for each council area.<sup>17</sup>

In the UK and other countries, admission rates are significantly correlated with measures of social deprivation.<sup>18</sup> To control for socioeconomic deprivation, we used data from the Index of Multiple Deprivation (IMD) 2015, the official area-based measure of relative deprivation in England. We used

1  
2  
3 the Income Deprivation Affecting Older People Index (IDAOPI), a supplementary index to the overall  
4 income domain that measures the proportion of adults aged 60 or over living in income deprived  
5 households in each council area.<sup>19</sup> We grouped council-level IDAOPI scores into fifths, with the first  
6 quintile group representing the least deprived.  
7

8 Counts of deaths by age group, gender and local authority were supplied by the Office of National  
9 Statistics. Mortality rates for people aged 65 years and over were calculated by dividing the number  
10 of deaths by the population for each council and year.  
11  
12

### 13 *Statistical analyses*

14 We initially investigated the unadjusted trends in the rates of emergency hospital admissions and  
15 government social care spend, in total and by council.  
16

17 We used multivariable regression analysis for panel data to assess the relation between emergency  
18 hospital admissions (response variable), and net spend on government-funded social care for older  
19 people (predictor variable). We used negative binomial regression models as these are appropriate  
20 when the outcome is a count variable.<sup>20</sup> To adjust for differences in population sizes of older people  
21 we included the size of the population aged 65 years and over as an exposure variable. Panel data  
22 models were used to help reduce the risk of omitted variable bias. Given that we were interested in  
23 the population-averaged effect, we used general estimating equations to estimate the model  
24 coefficients. Decisions relating to selecting variables and the model correlation structure were made  
25 using the quasiliikelihood under the independence model criterion (QIC).<sup>21</sup>  
26  
27

28 For each council we decomposed the variable representing government spending on social care into  
29 two new variables: a time-invariant average spend and a time-varying difference from average spend.  
30 This allowed us to assess the influence on our outcome of variation in social care spend 'within'  
31 councils (e.g. over time) and 'between' councils.  
32

33 Mortality rates among people aged 65 years and over and deprivation levels (IDAOPI quintiles) were  
34 used to control for differences in levels of population need.  
35

36 To adjust for the long-term trend in emergency hospital admissions and to control for unobserved in-  
37 year effects we included dummy variables for each year. We used robust standard errors to reflect the  
38 fact that populations were not sampled independently and to ensure that standard errors were robust  
39 to serial correlation in the data.  
40

41 Models were prepared for two outcome variables: all emergency admissions for people aged 65 and  
42 over (our primary outcome variable) and the subset of these which were for Ambulatory Care Sensitive  
43 Conditions (ACSC).  
44

45 Regression analyses were performed with Stata IC 15.1. Data preparation was done using R Statistical  
46 Software (version 3.3.2; R Foundation for Statistical Computing, Vienna, Austria).  
47  
48

### 49 *Sensitivity Analyses*

50 We performed several analyses to test the sensitivity of model results to outlier values and to  
51 elements of the model specification. To test the effect of outliers on the model coefficients, we  
52 calculated dfbeta values for each council for the variable representing government spend on social  
53 care and reran the model removing those councils with the highest dfbeta values. To test the  
54 sensitivity of the results on the choice of a population-averaged modelling approach, we recreated the  
55 model using a random effects approach. To test the sensitivity of the results to lagged or leading  
56 effects of the time-varying independent variables we reran the model lagging by one year the  
57 government spend on social care (on the basis that the impact of a change in social care spend may  
58 have a delayed impact on emergency admissions), and leading by one year the mortality rate variable  
59  
60

1  
2  
3 (given that emergency admissions are known to rise exponentially for several years prior to death.<sup>22</sup>  
4 Based on QIC values, our model incorporates year as a series of 10 (T-1) dummy variables, rather than  
5 as a single linear covariate. However, to assess whether the treatment of time in our model influenced  
6 the relationship between our outcome variable and our variable of interest, we produced a version of  
7 the model which incorporated time as a linear covariate. Finally we tested the sensitivity of the model  
8 results to the specification of an independent within-group correlation structure.  
9  
10  
11  
12  
13  
14  
15  
16  
17  
18  
19  
20  
21  
22  
23  
24  
25  
26  
27  
28  
29  
30  
31  
32  
33  
34  
35  
36  
37  
38  
39  
40  
41  
42  
43  
44  
45  
46  
47  
48  
49  
50  
51  
52  
53  
54  
55  
56  
57  
58  
59  
60

For peer review only

## Results

### Descriptive Analysis

Between 2005/6 and 2015/16, the population aged 65 and over grew on average by 1.9% per annum from 7.0 million to 8.4 million (see table 1). Over the same period emergency hospital admissions of patients aged 65 and over rose by 3.0% per annum (see figure 1). Government spend on social care for this age group reduced by 0.6% per annum after adjusting for inflation (see figure 2).

Table 1 : Trends in Admissions, Spend and Population 2005/06 to 2015/16

| Financial Year              | Emergency Admissions 65+ | Emergency ACS Admissions 65+ | Nominal Government Net Spend on Social Care 65+ £'000s | Real Government Net Spend on Social Care 65+ £'000s | Population 65+ |
|-----------------------------|--------------------------|------------------------------|--------------------------------------------------------|-----------------------------------------------------|----------------|
| 2005/06                     | 1,567,224                | 289,869                      | 6,343,870                                              | 7,614,136                                           | 7,003,820      |
| 2006/07                     | 1,582,563                | 290,864                      | 6,431,484                                              | 7,492,147                                           | 7,033,496      |
| 2007/08                     | 1,601,874                | 294,160                      | 6,532,431                                              | 7,429,803                                           | 7,102,647      |
| 2008/09                     | 1,711,155                | 315,962                      | 6,822,653                                              | 7,554,620                                           | 7,212,610      |
| 2009/10                     | 1,778,569                | 322,447                      | 7,037,350                                              | 7,686,557                                           | 7,341,814      |
| 2010/11                     | 1,830,922                | 343,736                      | 7,088,728                                              | 7,603,647                                           | 7,480,386      |
| 2011/12                     | 1,858,048                | 353,325                      | 6,780,726                                              | 7,173,625                                           | 7,655,402      |
| 2012/13                     | 1,931,868                | 356,201                      | 6,745,162                                              | 6,989,226                                           | 7,918,734      |
| 2013/14                     | 1,961,560                | 361,803                      | 6,772,647                                              | 6,903,890                                           | 8,127,137      |
| 2014/15                     | 2,074,679                | 399,288                      | 6,914,530                                              | 6,945,018                                           | 8,312,128      |
| 2015/16                     | 2,098,280                | 409,775                      | 7,142,173                                              | 7,142,173                                           | 8,422,502      |
| Compound annual growth rate | +3.0%                    | +3.5%                        | +1.2%                                                  | -0.6%                                               | +1.9%          |

There is considerable variation between councils in the levels of spend on social care and emergency admissions per head of population (see figure 3). Rate of social care spend and emergency admissions are notably higher in the most deprived quintile.

Figure 1 – Emergency hospital admissions aged 65+ per head of population aged 65+

Figure 2 – Nominal and real (inflation adjusted) Government net spend on social care for people aged 65+ (£'000s) per head of population aged 65+

Figure 3 : Government spend on social care (£'000s), emergency and ACS admissions per head of population (65+) by council and IDAOP1 (deprivation) quintile

### Model Results

Having adjusted for the other model covariates, we found no statistically significant relationship between the rate of government spend on social care within a council and our primary outcome variable, emergency hospital admissions (IRR 1.009, 95% CI 0.965-1.056) – see table 2. Likewise we found no significant relationship with our secondary outcome, ambulatory care sensitive admissions (IRR 0.975, 95% CI 0.917-1.038) – see table 3.

Table 2: Model Results (outcome: emergency hospital admissions 65+, exposure: population aged 65+)

| Covariate              |                                                              | IRR              | p> z   | 95% Conf. Interval |       |       |
|------------------------|--------------------------------------------------------------|------------------|--------|--------------------|-------|-------|
| Time-varying effects   | Real Net Spend on Social Care (within effect) <sup>a*</sup>  | 1.009            | 0.410  | 0.965              | 1.056 |       |
|                        | Deaths <sup>**</sup>                                         | 1.010            | <0.001 | 1.007              | 1.014 |       |
| Time invariant effects | Real Net Spend on Social Care (between effect) <sup>b*</sup> |                  | 1.138  | <0.001             | 1.079 | 1.200 |
|                        | Deprivation (IDAOP1)                                         | Quintile 1 (ref) | 1.000  | -                  | -     | -     |
|                        |                                                              | Quintile 2       | 1.059  | 0.048              | 1.000 | 1.121 |
|                        |                                                              | Quintile 3       | 1.145  | <0.001             | 1.099 | 1.193 |
|                        |                                                              | Quintile 4       | 1.156  | <0.001             | 1.088 | 1.228 |
|                        |                                                              | Quintile 5       | 1.226  | <0.001             | 1.148 | 1.310 |
| Year                   | 2005/06 (ref)                                                |                  | 1.000  | -                  | -     | -     |
|                        | 2006/07                                                      |                  | 1.024  | <0.001             | 1.012 | 1.037 |
|                        | 2007/08                                                      |                  | 1.034  | <0.001             | 1.021 | 1.047 |
|                        | 2008/09                                                      |                  | 1.090  | <0.001             | 1.076 | 1.105 |
|                        | 2009/10                                                      |                  | 1.143  | <0.001             | 1.121 | 1.165 |
|                        | 2010/11                                                      |                  | 1.167  | <0.001             | 1.141 | 1.194 |
|                        | 2011/12                                                      |                  | 1.179  | <0.001             | 1.148 | 1.212 |
|                        | 2012/13                                                      |                  | 1.183  | <0.001             | 1.152 | 1.216 |
|                        | 2013/14                                                      |                  | 1.175  | <0.001             | 1.139 | 1.211 |
|                        | 2014/15                                                      |                  | 1.230  | <0.001             | 1.189 | 1.273 |
| 2015/16                |                                                              | 1.203            | <0.001 | 1.168              | 1.240 |       |
| Constant               |                                                              | 0.107            | <0.001 | 0.089              | 0.130 |       |

<sup>a</sup> in-year difference from average spend in the local authority between 2005/6 and 2015/16

<sup>b</sup> average spend in the local authority between 2005/6 and 2015/16

\* per head population aged 65+

\*\* per 1,000 population aged 65+

Table 3: Model Results (outcome: ACS hospital admissions 65+, exposure: population aged 65+)

| Covariate              |                                                              | IRR              | p> z   | 95% Conf. Interval |       |       |
|------------------------|--------------------------------------------------------------|------------------|--------|--------------------|-------|-------|
| Time-varying effects   | Real Net Spend on Social Care (within effect) <sup>a*</sup>  | 0.975            | 0.790  | 0.917              | 1.038 |       |
|                        | Deaths**                                                     | 1.014            | <0.001 | 1.008              | 1.019 |       |
| Time invariant effects | Real Net Spend on Social Care (between effect) <sup>b*</sup> |                  | 1.230  | <0.001             | 1.138 | 1.330 |
|                        | Deprivation (IDAOP1)                                         | Quintile 1 (ref) | 1.000  | -                  | -     | -     |
|                        |                                                              | Quintile 2       | 1.100  | 0.001              | 1.038 | 1.165 |
|                        |                                                              | Quintile 3       | 1.234  | <0.001             | 1.169 | 1.303 |
|                        |                                                              | Quintile 4       | 1.269  | <0.001             | 1.188 | 1.356 |
|                        |                                                              | Quintile 5       | 1.352  | <0.001             | 1.226 | 1.491 |
| Year                   | 2005/06 (ref)                                                |                  | 1.000  | -                  | -     | -     |
|                        | 2006/07                                                      |                  | 1.018  | 0.019              | 1.003 | 1.033 |
|                        | 2007/08                                                      |                  | 1.031  | 0.001              | 1.013 | 1.050 |
|                        | 2008/09                                                      |                  | 1.090  | <0.001             | 1.069 | 1.112 |
|                        | 2009/10                                                      |                  | 1.138  | <0.001             | 1.102 | 1.174 |
|                        | 2010/11                                                      |                  | 1.202  | <0.001             | 1.159 | 1.247 |
|                        | 2011/12                                                      |                  | 1.235  | <0.001             | 1.182 | 1.290 |
|                        | 2012/13                                                      |                  | 1.197  | <0.001             | 1.145 | 1.252 |
|                        | 2013/14                                                      |                  | 1.188  | <0.001             | 1.133 | 1.244 |
|                        | 2014/15                                                      |                  | 1.302  | <0.001             | 1.237 | 1.371 |
| 2015/16                |                                                              | 1.281            | <0.001 | 1.226              | 1.337 |       |
| Constant               |                                                              | 0.015            | <0.001 | 0.011              | 0.020 |       |

<sup>a</sup> in-year difference from average spend in the local authority between 2005/6 and 2015/16

<sup>b</sup> average spend in the local authority between 2005/6 and 2015/16

\* per head population aged 65+

\*\* per 1,000 population aged 65+

### Sensitivity Analyses

We reproduced the models excluding the nine councils with the highest  $\delta\beta$  values (more than 2 standard deviations from zero) for the variable representing government spend on social care within councils. This did not alter the significance of the incident risk ratio for social care spend.

Similarly, reproducing the model with a random effects formulation did not alter the significance of the incident risk ratio for social care spend.

Lagging the variable representing government spend on social care (within councils) and leading the variable representing mortality rate by one time unit did not alter the significance of the incident risk ratio for social care spend.

1  
2  
3 When we incorporated year as a linear covariate (rather than as a set of dummy variables), the  
4 incident risk ratio increased marginally and became statistically significant.  
5

6 The incidence risk ratio for social care spend was not materially altered when alternative within-group  
7 correlation structures (exchangeable, unstructured and autoregressive order 1) were specified.  
8

9 Supplementary file 2 contains the model coefficient and 95% confidence intervals for our variable of  
10 interest in each of the sensitivity analyses described above.  
11  
12  
13  
14  
15  
16  
17  
18  
19  
20  
21  
22  
23  
24  
25  
26  
27  
28  
29  
30  
31  
32  
33  
34  
35  
36  
37  
38  
39  
40  
41  
42  
43  
44  
45  
46  
47  
48  
49  
50  
51  
52  
53  
54  
55  
56  
57  
58  
59  
60

For peer review only

## Discussion

### *Key findings*

Across our study population, Government spend on social care for people aged 65 and over fell by £472m (6.2%) in real terms between 2005/6 and 2015/16. We conclude that this was not associated with an increase in emergency hospital admissions. This finding is at odds with both intuition and the perceptions of those working in acute hospitals. We will explore a range of potential (and interrelated) explanations for this effect.

The prima-facie explanation for the observed results is that social care provision is not an effective means of preventing emergency hospital admissions for older people. It is likely that individuals who have been affected by reductions in social care spend to date are those whose need levels are close to eligibility thresholds and therefore have the lowest ability to benefit. It does not necessarily follow therefore that further reductions in social care spend will not result in increases in emergency hospital admissions. Moreover, our finding should not be taken as evidence of the ineffectiveness of social care in more general respects. The effectiveness of social care with respect to quality of life, for example, has been studied elsewhere and whilst this evidence base remains limited, on balance it suggests that the provision of social care leads to quality of life benefits.<sup>23</sup>

Another explanation for the findings is that social care provision may avoid hospital admissions by improving the health status of older people but that these gains are offset as social workers and social care professionals identify unmet need and trigger a healthcare intervention leading to hospital admission. This could arise for example if a social care professional notices a deterioration in a patient's health status, referring the patient to a General Practitioner or Emergency Department. Whilst the UK has a strong primary health care system and might be expected to manage clinical risks in these circumstances, GP services are under pressure and access to primary care remains a problem. These direct and countervailing effects may be reduced in tandem as social care spend is reduced. This mechanism has been proposed for other interventions that aimed, but failed to reduce emergency admissions in older people.<sup>24</sup>

A third explanation focuses on the effect of substituting government funded social care for privately funded social care and informal care. Whilst substitution may not occur in all cases, privately funded social care and informal care may be allocated more efficiently than government-funded social care, offsetting the losses associated with those individuals who now receive no care. However, the English Longitudinal Study of Ageing (ELSA) suggests that the use of privately funded social care fell between 2004/5 and 2014/15 for those reporting problems with activities of daily living (e.g. walking, bathing, dressing) and instrumental activities of daily living (e.g. cooking, shopping).<sup>25</sup> While public and private provision have been falling informal care has increased substantially. A survey conducted by Department of Work & Pensions estimates that 8% (4.9million) of people were informal carers in England in 2016.<sup>26</sup> Since 2004 the average daily minutes of adult care provided by those aged 8 or over has risen year on year.<sup>27</sup> The gross value added of informal adult care in the UK increased by 45.8% between 2005 and 2014, from £39.0 billion to £56.9 billion.<sup>28</sup> These figures demonstrate a substantial and sustained shift from public to informal care provision over the period of this study.

Whilst healthcare services have been spared the severe funding cuts seen in other public services, healthcare services nonetheless report significant funding pressures. Many initiatives have sought to manage demand for emergency hospital admissions and a recent study demonstrated that thresholds for admission via emergency departments increased over the period from 2009/10 to 2014/15.<sup>29</sup> These supply constraints and changes in clinical behaviour may explain why reductions in social care spend have not resulted in increases in emergency hospital admissions.

Finally, we consider the impact of substantial funding constraints on the efficiency of social care services. To accommodate cuts in funding many social services departments have tightened need-based access criteria for services and have introduced reablement and preventative services to reduce



1  
2  
3 long-term demand for care. This may have increased the efficiency of social care, improving the  
4 health status of service users and offsetting the losses to those who no longer receive government  
5 funded care. Local authorities facing the largest cuts may have undertaken the most radical redesign  
6 of services and achieved the greatest efficiency gains.  
7

### 8 9 10 *Limitations*

11 Ecological studies of this type are susceptible to a number of forms of bias. However, our  
12 conservative modelling approach and the study's statistical power imply that it is extremely unlikely  
13 that reductions in social care spend resulted in material increases in emergency admissions at a  
14 population level. None of the sensitivity analyses provided contrary evidence.  
15

16 As with all observational studies, we must consider the possibility that our observed result can be  
17 explained by the omission of a key explanatory variable. Given the use of panel data, any influential  
18 omitted variable must be a time-varying effect operating within councils, which is strongly associated  
19 with our dependant variable and our variable of interest. One candidate is household income.  
20 However, income inequality in retired households has grown since 2009/10 and over the same period  
21 councils with higher levels of deprivation have seen the greater reductions in social care spend.<sup>30</sup> We  
22 would expect these changes to amplify rather than obscure any relationship between social care  
23 spend and emergency admissions.  
24

25 Given the ecological nature of our study, we should consider the possibility that reductions in social  
26 care spend have indeed resulted in increases in emergency admissions, but that equivalent reductions  
27 in emergency hospital admissions have occurred in other groups of older people. We can think of no  
28 clear mechanism that might correspond to this theory.  
29

30 In 2014/15, the financial reporting framework used to collect data from councils on government spend  
31 on social care was substantially redesigned. The mapping of categories required to create consistent  
32 time series introduces the potential for error. However, our sensitivity analyses did not indicate that  
33 the results were substantially affected by the presence of outliers. A small number of councils were  
34 excluded from our analysis. Whilst the rationale for the exclusions are clear and explicitly described,  
35 this process may have introduced bias.  
36

37 Whilst this study did not explicitly control for changes in the age profile or morbidity levels of the  
38 study population, the use of mortality rates as an independent variable adjusts for these factors  
39 indirectly.  
40  
41

### 42 43 *Relation to Existing Literature*

44 Unlike our study, the small number of previous studies which have explored the relationship between  
45 social spend or provision and healthcare use have found evidence of a substitution effect. A cross-  
46 sectional analysis using small area data in England found the cost effects of a transfer of resources  
47 from hospitals to care homes were broadly neutral, but this study pre-dates the recent significant  
48 reductions in social care expenditure.<sup>8</sup> A later study using panel data found delayed discharges from  
49 hospitals in England responded, if only weakly, to increases in the supply of care home beds.<sup>9</sup> A  
50 Norwegian study, using patient level data, reported that after controlling for casemix, hospital, and  
51 time fixed effects, higher levels of social care capacity were associated with reduced hospital length of  
52 stay.<sup>10</sup> A 2012 study demonstrated interactions in the use of hospital care and social care for older  
53 people in England and that residents of care homes tended to use hospitals less frequently than  
54 people receiving home care.<sup>31</sup> A working paper published by the Institute of Fiscal Studies concluded  
55 that cuts in government spending on social care had led to increases in attendances at English  
56 accident and emergency departments, but not to subsequent hospital admissions.<sup>32</sup>  
57  
58  
59  
60

### *Implications for Policy and Research*

We recommend further work on this subject to verify or rebut our results, to test the credibility of the mechanisms we have proposed to explain our results or to identify and test alternative mechanisms. We have made the panel dataset available with this paper to allow others to replicate the study's methods and explore alternative approaches to test the relationship between emergency hospital admissions and spend on social care.

Policy makers should review schemes, such as the Better Care Fund, which are predicated on the belief that emergency hospital admissions can be reduced by increasing social care provision. Our analysis suggests that this approach is unlikely to succeed. Healthcare commissioners should consider alternative, evidence-based methods of moderating demand for emergency hospital care.

We note that the NHS's latest social care funding initiative, the Improved Better Care Fund (iBCF), aims to reduce hospital length of stay and delayed transfers of care rather than prevent emergency admissions. Further research should be carried out to test the limited evidence supporting this approach.

### **Conclusion**

We found no evidence to support the view that reductions in government spend on social care since 2008 have led to increases in emergency hospital admissions in older people.

### *Contribution Statement*

Paul Seamer, Prof Simon Brake and Steven Wyatt conceived the research. Paul Seamer assembled the data. Paul Seamer and Steven Wyatt conducted the analysis and drafted the manuscript. Dr. Patrick Moore and Prof. Mohammed Mohammed offered advice on the selection of statistical model and reviewed the analysis. Prof. Brake framed the analysis within a policy context. All authors reviewed and commented on the draft manuscripts.

### *Conflicts of Interest*

SB is employed by NHS Walsall CCG which jointly commissions social care services for older people through the Better Care Fund. SB was previously employed by Coventry City Council, a commissioner and provider of social care for older people.

The authors have no other relationships or activities that could appear to have influenced the submitted work.

### *Copyright, open access and permission to reuse*

The Corresponding Author has the right to grant on behalf of all authors and does grant on behalf of all authors, a worldwide licence (<http://www.bmj.com/sites/default/files/BMJ%20Author%20Licence%20March%202013.doc>) to the Publishers and its licensees in perpetuity, in all forms, formats and media (whether known now or created in the future), to i) publish, reproduce, distribute, display and store the Contribution, ii) translate the Contribution into other languages, create adaptations, reprints, include within collections and create summaries, extracts and/or, abstracts of the Contribution and convert or allow conversion into any format including without limitation audio, iii) create any other derivative work(s) based in whole or part on the on the Contribution, iv) to exploit all subsidiary rights to exploit all subsidiary rights that currently exist or as may exist in the future in the Contribution, v) the inclusion of electronic links from the Contribution to third party material where-ever it may be located; and, vi) licence any third party to do any or all of the above. All research articles will be made available on an Open Access basis (with authors being asked to pay an open access fee—see <http://www.bmj.com/about-bmj/resources-authors/forms-policies-and-checklists/copyright-open-access-and-permission-reuse>). The terms of such Open Access shall be governed by a Creative Commons licence—details as to which Creative Commons licence will apply to the research article are set out in our worldwide licence referred to above.

### *Transparency declaration*

Paul Seamer, the lead author, affirms that the manuscript is an honest, accurate, and transparent account of the study being reported; that no important aspects of the study have been omitted.

1  
2  
3 *Ethics approval*  
4

5 Ethics approval was not required. The research used historical anonymised data and did not influence  
6 patient care.  
7  
8  
9

10 *Patient and Public Involvement*  
11

12 Patients and member of the public were not involved in the design of this study.  
13  
14  
15

16 *Funding Statement*  
17

18 NHS Midlands and Lancashire Commissioning Support Unit received payment from NHS Coventry and  
19 Rugby Clinical Commissioning Group to conduct the initial analysis that led to this paper.  
20  
21  
22

23 *Data Availability Statement*  
24

25 Data are available upon request. The panel data constructed for this analysis includes all dependant  
26 and independent variables by year for each of the 132 English local authorities included in the study.  
27  
28  
29  
30  
31  
32  
33  
34  
35  
36  
37  
38  
39  
40  
41  
42  
43  
44  
45  
46  
47  
48  
49  
50  
51  
52  
53  
54  
55  
56  
57  
58  
59  
60

## References

- 1 Institute of Fiscal Studies & Nuffield Foundation, Central Cuts, Local Decision-Making: Changes in Local Government Spending and Revenues in England, 2009-10 to 2014-15, 2015 (<https://www.ifs.org.uk/uploads/publications/bns/BN166.pdf>)
- 2 NHS Digital, Community Care Statistics, Referrals, assessments and packages of care for adults - England, 2007-2008, National summary, 18 December 2008 (<https://digital.nhs.uk/catalogue/PUB01519>)
- 3 NHS Digital, Community Care Statistics, Social Services Activity, England - 2013-14, Final release (<https://digital.nhs.uk/catalogue/PUB16133>)
- 4 NHS Digital, Hospital Accident and Emergency Activity, 2016-17, October 2017, (<https://digital.nhs.uk/catalogue/PUB30112>)
- 5 Office of National Statistics, National Population Projections 2016, 2018 (<https://www.ons.gov.uk/peoplepopulationandcommunity/populationandmigration/populationprojections/bulletins/nationalpopulationprojections/2016basedstatisticalbulletin> )
- 6 Kings Fund, Quarterly Monitoring Report 1, October 2015 (<https://qmr.kingsfund.org.uk/2015/17/> )
- 7 Thorlby R, Fact of Fiction? Social care cuts are to blame for the 'crisis' in hospital emergency departments, Nuffield Trust comment, 29 January 2015 (<https://www.nuffieldtrust.org.uk/news-item/fact-or-fiction-social-care-cuts-are-to-blame-for-the-crisis-in-hospital-emergency-departments#fact-or-fiction> )
- 8 Forder J, Long-term care and hospital utilisation by older people: an analysis of substitution rates, Health Economics doi 10.1002/hec.14382009 , February 2009 (<http://onlinelibrary.wiley.com/doi/10.1002/hec.1438/abstract>)
- 9 Gaughan J, Gravelle H, Siciliani L, Testing the Bed-Blocking Hypothesis: Does Nursing and Care Home Supply Reduce Delayed Hospital Discharges?, Health Economics 10.1002/hec.3150 2March 2015 (<http://onlinelibrary.wiley.com/doi/10.1002/hec.3150/full>)
- 10 Holmas T, Islam M, Kjerstad E, Interdependency between social care and hospital care: the case of hospital length of stay, European Journal of Public Health Volume 23, Issue 6, Pages 927–93, December 2013 <https://academic.oup.com/eurpub/article/23/6/927/434760/Interdependency-between-social-care-and-hospital>)
- 11 Curry N, Ham C, Clinical and service integration, 2010 (<https://www.kingsfund.org.uk/sites/default/files/Clinical-and-service-integration-Natasha-Curry-Chris-Ham-22-November-2010.pdf> )
- 12 Department of Communities and Local Government & Department of Health, Integration and Better Care Fund planning requirements for 2017-19, (<https://www.england.nhs.uk/wp-content/uploads/2017/07/integration-better-care-fund-planning-requirements.pdf> )
- 13 NHS Digital, HES Data Dictionary – Admitted Patient Care, September 2017 (<http://content.digital.nhs.uk/media/25188/DD-APC-V10/pdf/DD-APC-V10.pdf> )
- 14 Purdy S, Griffin T, Salisbury C, Sharp D, Ambulatory care sensitive conditions: terminology and disease coding need to be more specific to aid policy makers and clinicians, Public Health. 2009 Feb;123(2):169-73. , 2010 (<https://www.ncbi.nlm.nih.gov/pubmed/19144363> )
- 15 NHS Digital, Adult Social Care Finance Return (ASC-FR) Guidance For the collection period 1 April 2015 – 31 March 2016, September 2015 ([http://content.digital.nhs.uk/media/16585/ASC-FR-Guidance-201516/pdf/ASC-FR\\_Guidance\\_2015-16\\_v1.1.pdf](http://content.digital.nhs.uk/media/16585/ASC-FR-Guidance-201516/pdf/ASC-FR_Guidance_2015-16_v1.1.pdf) )
- 16 HM Treasury, GDP deflators at market prices and money GDP, 28 November 2017 (<https://www.gov.uk/government/statistics/gdp-deflators-at-market-prices-and-money-gdp-november-2017-autumn-budget-2017> )
- 17 Office of National Statistics, Lower Super Output Area Mid-Year Population Estimates, 26 October 2017 (<https://www.ons.gov.uk/peoplepopulationandcommunity/populationandmigration/populationestimates/datasets/lowersuperoutputareamidyearpopulationestimates> )

- 1  
2  
3
- 
- 4 18 Majeed A, Bardsley M, Morgan D, O'sullivan C, Bindman A, Cross sectional study of primary care  
5 groups in London: association of measures of socioeconomic and health status with hospital  
6 admission rates, *BMJ* 2000;321:1057, 28 October 2000  
7 (<http://www.bmj.com/content/321/7268/1057.short> )
- 8 19 Department of Communities and Local Government, English Indices of Deprivation, 30 September  
9 2015 (<https://www.gov.uk/government/statistics/english-indices-of-deprivation-2015> )
- 10 20 Hilbe JM, Negative Binomial regression, Cambridge University Press, 2011
- 11 21 Cui J, QIC program and model selection in GEE analyses, *The Stata Journal* Volume 7 Number 2: pp.  
12 209-220, 2007 (<http://www.stata-journal.com/article.html?article=st0126> )
- 13 22 Seshamani M, Gray A, A longitudinal study of the effects of age and time to death on hospital costs,  
14 *J Health Econ.* 2004 Mar;23(2):217-35, 2004 (<https://www.ncbi.nlm.nih.gov/pubmed/15019753> )
- 15 23 Sutcliffe K, Rees R, Dickson K, Hargreaves K, Schucan-Bird K, Kwan I, Kavanagh J (all EPPI-Centre),  
16 Woodman J Gibson K, 2012, The adult social care outcomes framework: A systematic review of  
17 systematic reviews to support its use and development, December 2013  
18 (<https://eppi.ioe.ac.uk/cms/Portals/0/PDF%20reviews%20and%20summaries/ASCOF%202012Sutcliffe%20report.pdf?ver=2013-11-14-144947-670> )
- 19 24 Steventon A, Bardsley M, Billings J, Georghiou T, Lewis G, An evaluation of the impact of  
20 community-based interventions on hospital use, March 2011,  
21 (<https://www.nuffieldtrust.org.uk/research/an-evaluation-of-the-impact-of-community-based-interventions-on-hospital-use> )
- 22 25 English Longitudinal Study of Ageing (<https://www.elsa-project.ac.uk/about-ELSA> )
- 23 26 Department for Work & Pensions, Family Resources Survey, 2017  
24 (<https://www.gov.uk/government/collections/family-resources-survey--2> )
- 25 27 Office for National Statistics, Changes in the value and division of unpaid volunteering in the UK:  
26 2000 to 2015, 2017  
27 (<https://www.ons.gov.uk/economy/nationalaccounts/satelliteaccounts/articles/changesinthevalueanddivisionofunpaidcareworkintheuk/2000to2015#changes-in-the-division-of-unpaid-care-between-2000-and-2015-part-2-adult-care> )
- 28 28 Office for National Statistics, Household satellite accounts: 2005 to 2014, Chapter 3, 2016  
29 (<https://www.ons.gov.uk/economy/nationalaccounts/satelliteaccounts/compendium/householdsatelliteaccounts/2005to2014/chapter3homeproducedadultcareservices#gross-value-added-of-informal-adult-care> )
- 30 29 Wyatt S, Child K, Hood A, Cooke M, Mohammed M, Changes in admission thresholds in English  
31 emergency department, *Emerg Med J.* doi: 10.1136/emered-2016-206213, 12 September 2017  
32 (<http://emj.bmj.com/content/early/2017/09/12/emered-2016-206213> )
- 33 30 Office of National statistics , Household disposable income and inequality in the UK: financial year  
34 ending 2016, 10 January 2017  
35 (<https://www.ons.gov.uk/peoplepopulationandcommunity/personalandhouseholdfinances/incomeandwealth/bulletins/householddisposableincomeandinequality/financialyearending2016> )
- 36 31 Bardsley M, Georghiou T, Chassin L, Overlap of hospital use and social care in older people in  
37 England, *Journal of Health Services Research and policy* Volume: 17 issue: 3, page(s): 133-139, July  
38 2012 (<http://journals.sagepub.com/doi/abs/10.1258/JHSRP.2011.010171> )
- 39 32 Crawford R, Stoye G, Zaranka B, The impact of cuts to social care spending on the use of Accident  
40 and Emergency departments in England, IFS Working Paper W18/15, June 2018  
41 (<https://www.ifs.org.uk/uploads/publications/wps/WP201815.pdf> )
- 42  
43  
44  
45  
46  
47  
48  
49  
50  
51  
52  
53  
54  
55  
56  
57  
58  
59  
60

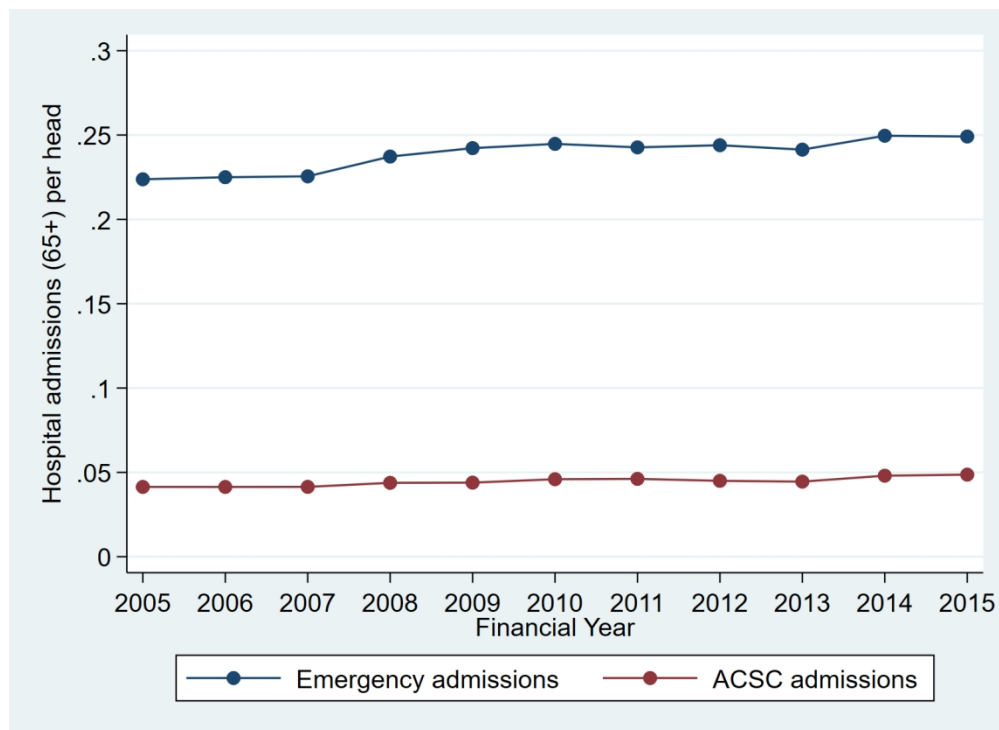

Figure 1 – Emergency hospital admissions aged 65+ per head of population aged 65+

139x101mm (300 x 300 DPI)

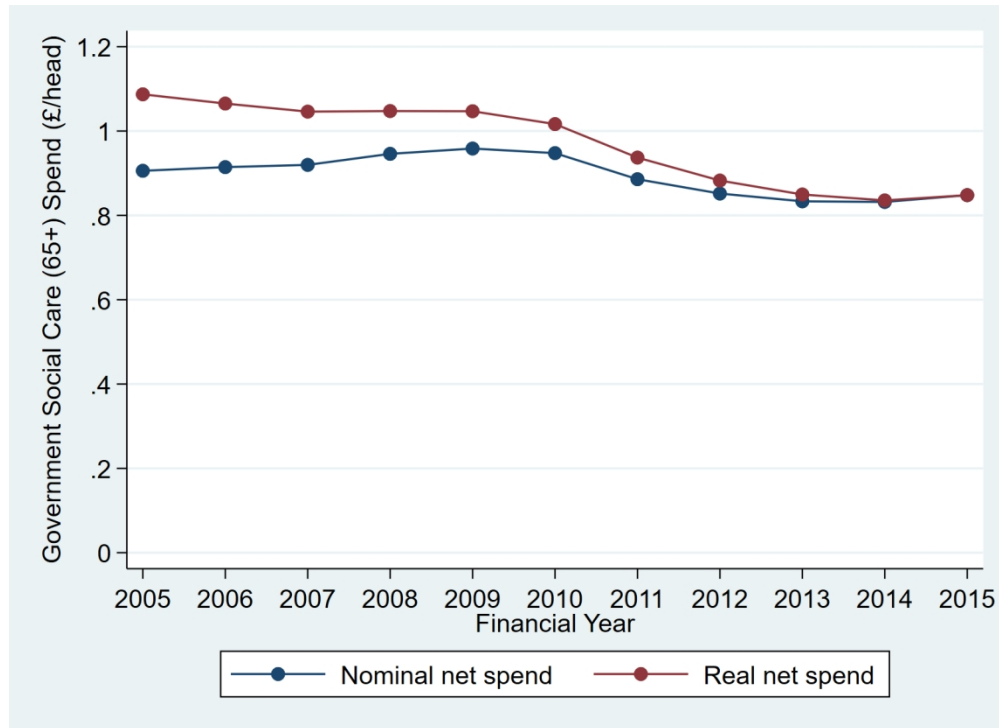

Figure 2 – Nominal and real (inflation adjusted) Government net spend on social care for people aged 65+ (£'000s) per head of population aged 65+

139x101mm (300 x 300 DPI)



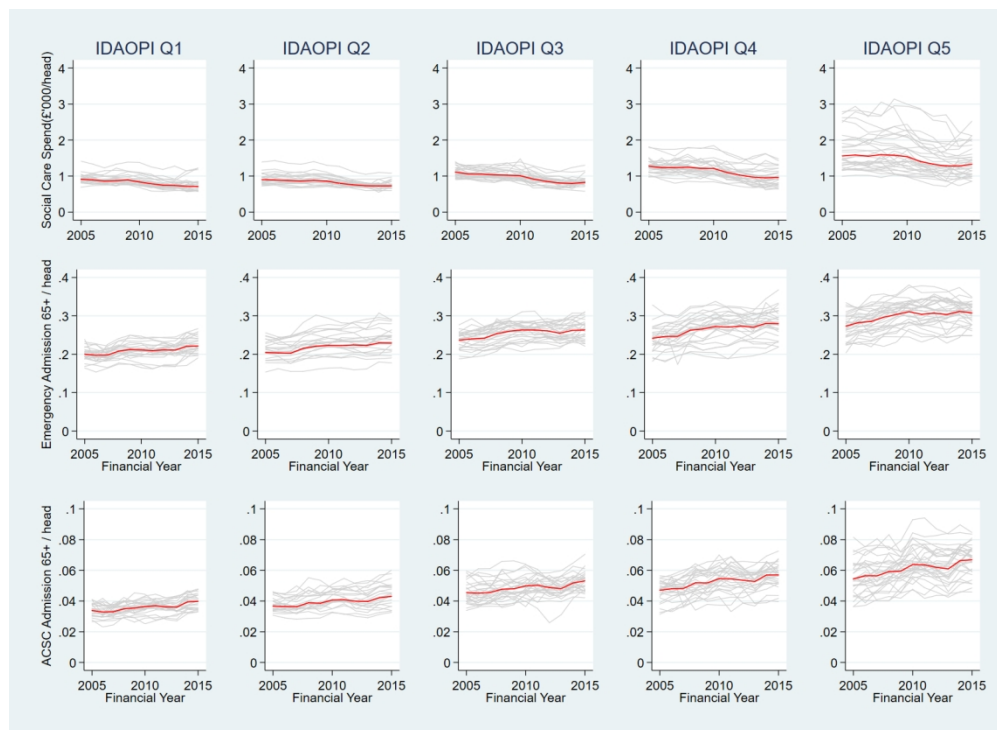

Figure 3 - Government spend on social care (£'000s), emergency and ACSC admissions per head of population (65+) by council and IDAOPI (deprivation) quintile

139x101mm (300 x 300 DPI)

**Supplementary File 1 – Councils with Responsibility for Social Services Excluded from Analysis**

*Established following structural changes to local government in April 2009 (n=9)*

County Durham

Shropshire

Cornwall

Wiltshire

Northumberland

Cheshire East

Cheshire West & Chester

Bedford

Central Bedfordshire

*Missing social care spend data in one or more years (n=3)*

Thurrock

Surrey

East Sussex

*Small population (n=3)*

The City of London

The Isles of Scilly

Rutland

*>50% year-on-year change in emergency hospital admissions in one or more years (n=5)*

Milton Keynes

Barnet

Enfield

Hounslow

Isle of Wight

## Supplementary File 2 – Results of Sensitivity Analyses

Coefficient for government spend on Social Care (within effect); outcome variable emergency admissions for patients aged 65+

|                                                            | <b>IRR</b> | <b>p&gt; z </b> | <b>95% Conf. Interval</b> |       |
|------------------------------------------------------------|------------|-----------------|---------------------------|-------|
| Primary Analysis                                           | 1.009      | 0.41            | 0.965                     | 1.056 |
| Sensitivity Analyses                                       |            |                 |                           |       |
| 1 : Excluding councils with highest dfbeta values          | 0.996      | 0.82            | 0.963                     | 1.030 |
| 2 : Random effects formulation                             | 1.020      | 0.15            | 0.993                     | 1.049 |
| 3 : Lagging spend on social care & leading mortality rates | 1.035      | 0.25            | 0.976                     | 1.099 |
| 4 : Treat year as linear covariate                         | 1.052      | 0.02            | 1.009                     | 1.097 |
| 5a : Correlation structure - exchangeable                  | 1.023      | 0.99            | 0.978                     | 1.069 |
| 5b : Correlation structure - unstructured                  | 1.015      | 1.00            | 0.986                     | 1.044 |
| 5c : Correlation structure – autoregressive (order1)       | 1.008      | 0.61            | 0.982                     | 1.036 |

**STROBE 2007 (v4) checklist of items to be included in reports of observational studies in epidemiology\***  
**Checklist for cohort, case-control, and cross-sectional studies (combined)**

| Section/Topic             | Item # | Recommendation                                                                                                                                                                                                                                                                                                                                                                                                                                                         | Reported on page # |
|---------------------------|--------|------------------------------------------------------------------------------------------------------------------------------------------------------------------------------------------------------------------------------------------------------------------------------------------------------------------------------------------------------------------------------------------------------------------------------------------------------------------------|--------------------|
| Title and abstract        | 1      | (a) Indicate the study's design with a commonly used term in the title or the abstract                                                                                                                                                                                                                                                                                                                                                                                 | 2                  |
|                           |        | (b) Provide in the abstract an informative and balanced summary of what was done and what was found                                                                                                                                                                                                                                                                                                                                                                    | 2                  |
| <b>Introduction</b>       |        |                                                                                                                                                                                                                                                                                                                                                                                                                                                                        |                    |
| Background/rationale      | 2      | Explain the scientific background and rationale for the investigation being reported                                                                                                                                                                                                                                                                                                                                                                                   | 3                  |
| Objectives                | 3      | State specific objectives, including any pre-specified hypotheses                                                                                                                                                                                                                                                                                                                                                                                                      | 3                  |
| <b>Methods</b>            |        |                                                                                                                                                                                                                                                                                                                                                                                                                                                                        |                    |
| Study design              | 4      | Present key elements of study design early in the paper                                                                                                                                                                                                                                                                                                                                                                                                                | 4                  |
| Setting                   | 5      | Describe the setting, locations, and relevant dates, including periods of recruitment, exposure, follow-up, and data collection                                                                                                                                                                                                                                                                                                                                        | 4                  |
| Participants              | 6      | (a) <i>Cohort study</i> —Give the eligibility criteria, and the sources and methods of selection of participants. Describe methods of follow-up<br><i>Case-control study</i> —Give the eligibility criteria, and the sources and methods of case ascertainment and control selection. Give the rationale for the choice of cases and controls<br><i>Cross-sectional study</i> —Give the eligibility criteria, and the sources and methods of selection of participants | 4                  |
|                           |        | (b) <i>Cohort study</i> —For matched studies, give matching criteria and number of exposed and unexposed<br><i>Case-control study</i> —For matched studies, give matching criteria and the number of controls per case                                                                                                                                                                                                                                                 |                    |
| Variables                 | 7      | Clearly define all outcomes, exposures, predictors, potential confounders, and effect modifiers. Give diagnostic criteria, if applicable                                                                                                                                                                                                                                                                                                                               | 4,5                |
| Data sources/ measurement | 8*     | For each variable of interest, give sources of data and details of methods of assessment (measurement). Describe comparability of assessment methods if there is more than one group                                                                                                                                                                                                                                                                                   | 4,5                |
| Bias                      | 9      | Describe any efforts to address potential sources of bias                                                                                                                                                                                                                                                                                                                                                                                                              | 4,5                |
| Study size                | 10     | Explain how the study size was arrived at                                                                                                                                                                                                                                                                                                                                                                                                                              | 4                  |
| Quantitative variables    | 11     | Explain how quantitative variables were handled in the analyses. If applicable, describe which groupings were chosen and why                                                                                                                                                                                                                                                                                                                                           | 4,5                |
| Statistical methods       | 12     | (a) Describe all statistical methods, including those used to control for confounding                                                                                                                                                                                                                                                                                                                                                                                  | 5, 6               |
|                           |        | (b) Describe any methods used to examine subgroups and interactions                                                                                                                                                                                                                                                                                                                                                                                                    | 5,6                |
|                           |        | (c) Explain how missing data were addressed                                                                                                                                                                                                                                                                                                                                                                                                                            | 4,5,6              |
|                           |        | (d) <i>Cohort study</i> —If applicable, explain how loss to follow-up was addressed<br><i>Case-control study</i> —If applicable, explain how matching of cases and controls was addressed                                                                                                                                                                                                                                                                              | 4                  |

|                          |     |                                                                                                                                                                                                              |                            |
|--------------------------|-----|--------------------------------------------------------------------------------------------------------------------------------------------------------------------------------------------------------------|----------------------------|
|                          |     | <i>Cross-sectional study</i> —If applicable, describe analytical methods taking account of sampling strategy                                                                                                 |                            |
|                          |     | (e) Describe any sensitivity analyses                                                                                                                                                                        | 5,6                        |
| <b>Results</b>           |     |                                                                                                                                                                                                              |                            |
| Participants             | 13* | (a) Report numbers of individuals at each stage of study—eg numbers potentially eligible, examined for eligibility, confirmed eligible, included in the study, completing follow-up, and analysed            | 4                          |
|                          |     | (b) Give reasons for non-participation at each stage                                                                                                                                                         | 4                          |
|                          |     | (c) Consider use of a flow diagram                                                                                                                                                                           | n/a                        |
| Descriptive data         | 14* | (a) Give characteristics of study participants (eg demographic, clinical, social) and information on exposures and potential confounders                                                                     |                            |
|                          |     | (b) Indicate number of participants with missing data for each variable of interest                                                                                                                          | 4, 7, supplementary file 2 |
|                          |     | (c) <i>Cohort study</i> —Summarise follow-up time (eg, average and total amount)                                                                                                                             | 4                          |
| Outcome data             | 15* | <i>Cohort study</i> —Report numbers of outcome events or summary measures over time                                                                                                                          | 7                          |
|                          |     | <i>Case-control study</i> —Report numbers in each exposure category, or summary measures of exposure                                                                                                         |                            |
|                          |     | <i>Cross-sectional study</i> —Report numbers of outcome events or summary measures                                                                                                                           | 7                          |
| Main results             | 16  | (a) Give unadjusted estimates and, if applicable, confounder-adjusted estimates and their precision (eg, 95% confidence interval). Make clear which confounders were adjusted for and why they were included | 8, 9                       |
|                          |     | (b) Report category boundaries when continuous variables were categorized                                                                                                                                    | 4                          |
|                          |     | (c) If relevant, consider translating estimates of relative risk into absolute risk for a meaningful time period                                                                                             | n/a                        |
| Other analyses           | 17  | Report other analyses done—eg analyses of subgroups and interactions, and sensitivity analyses                                                                                                               | 9,10                       |
| <b>Discussion</b>        |     |                                                                                                                                                                                                              |                            |
| Key results              | 18  | Summarise key results with reference to study objectives                                                                                                                                                     | 10                         |
| Limitations              | 19  | Discuss limitations of the study, taking into account sources of potential bias or imprecision. Discuss both direction and magnitude of any potential bias                                                   | 10,11                      |
| Interpretation           | 20  | Give a cautious overall interpretation of results considering objectives, limitations, multiplicity of analyses, results from similar studies, and other relevant evidence                                   | 13                         |
| Generalisability         | 21  | Discuss the generalisability (external validity) of the study results                                                                                                                                        | 12                         |
| <b>Other information</b> |     |                                                                                                                                                                                                              |                            |
| Funding                  | 22  | Give the source of funding and the role of the funders for the present study and, if applicable, for the original study on which the present article is based                                                | 14                         |

\*Give information separately for cases and controls in case-control studies and, if applicable, for exposed and unexposed groups in cohort and cross-sectional studies.

1  
2  
3  
4  
5  
6  
7  
8  
9  
10  
11  
12  
13  
14  
15  
16  
17  
18  
19  
20  
21  
22  
23  
24  
25  
26  
27  
28  
29  
30  
31  
32  
33  
34  
35  
36  
37  
38  
39  
40  
41  
42  
43  
44  
45  
46

**Note:** An Explanation and Elaboration article discusses each checklist item and gives methodological background and published examples of transparent reporting. The STROBE checklist is best used in conjunction with this article (freely available on the Web sites of PLoS Medicine at <http://www.plosmedicine.org/>, Annals of Internal Medicine at <http://www.annals.org/>, and Epidemiology at <http://www.epidem.com/>). Information on the STROBE Initiative is available at [www.strobe-statement.org](http://www.strobe-statement.org).

For peer review only

# BMJ Open

## Did Government Spending Cuts to Social Care for Older People Lead to an Increase in Emergency Hospital Admissions? An Ecological Study; England 2005 to 2016

|                                 |                                                                                                                                                                                                                                                                                                                                                                                                                                                                                                                                    |
|---------------------------------|------------------------------------------------------------------------------------------------------------------------------------------------------------------------------------------------------------------------------------------------------------------------------------------------------------------------------------------------------------------------------------------------------------------------------------------------------------------------------------------------------------------------------------|
| Journal:                        | <i>BMJ Open</i>                                                                                                                                                                                                                                                                                                                                                                                                                                                                                                                    |
| Manuscript ID                   | bmjopen-2018-024577.R2                                                                                                                                                                                                                                                                                                                                                                                                                                                                                                             |
| Article Type:                   | Research                                                                                                                                                                                                                                                                                                                                                                                                                                                                                                                           |
| Date Submitted by the Author:   | 26-Feb-2019                                                                                                                                                                                                                                                                                                                                                                                                                                                                                                                        |
| Complete List of Authors:       | Seamer, Paul; NHS Midlands and Lancashire Commissioning Support Unit, The Strategy Unit<br>Brake, Simon; University of Warwick, Warwick Medical School; NHS Walsall Clinical Commissioning Group<br>Moore, Patrick; University of Birmingham, Institute of Applied Health Research<br>Mohammed, Mohammed; NHS Midlands and Lancashire Commissioning Support Unit, The Strategy Unit; University of Bradford, Faculty of Health Studies<br>Wyatt, Steven; NHS Midlands and Lancashire Commissioning Support Unit, The Strategy Unit |
| <b>Primary Subject Heading</b>: | Health policy                                                                                                                                                                                                                                                                                                                                                                                                                                                                                                                      |
| Secondary Subject Heading:      | Health economics, Health services research                                                                                                                                                                                                                                                                                                                                                                                                                                                                                         |
| Keywords:                       | social care, emergency hospital admissions, older people, government spending                                                                                                                                                                                                                                                                                                                                                                                                                                                      |
|                                 |                                                                                                                                                                                                                                                                                                                                                                                                                                                                                                                                    |

SCHOLARONE™  
Manuscripts

1  
2  
3  
4  
5 **Did Government Spending Cuts to Social Care for Older People Lead to an Increase in**  
6 **Emergency Hospital Admissions? An Ecological Study; England 2005 to 2016**  
7  
8  
9  
10  
11  
12

13 **Paul Seamer**

14 The Strategy Unit, NHS Midlands and Lancashire Commissioning Support Unit  
15 West Bromwich, West Midlands UK  
16

17 **Prof. Simon Brake**

18 Warwick Medical School, University of Warwick  
19 Coventry, West Midlands, UK  
20 &  
21 NHS Walsall Clinical Commissioning Group,  
22 Walsall, West Midlands, UK  
23  
24

25 **Dr. Patrick Moore**

26 Institute of Applied Health Research, University of Birmingham  
27 Birmingham, West Midlands, UK  
28

29 **Prof. Mohammed A Mohammed**

30 The Strategy Unit, NHS Midlands and Lancashire Commissioning Support Unit  
31 West Bromwich, West Midlands UK  
32 &  
33 Faculty of Health Studies, University of Bradford  
34 Bradford, West Yorkshire, UK  
35  
36

37 **Steven Wyatt (corresponding author)**

38 The Strategy Unit, NHS Midlands and Lancashire Commissioning Support Unit  
39 Postal address: Kingston House, 438-450 High Street, West Bromwich, West Midlands, B70 9LD, UK  
40 Email: [swyatt@nhs.net](mailto:swyatt@nhs.net)  
41 Telephone: 0121 612 3872  
42  
43  
44  
45  
46

47 **Word count** : 5,046 words  
48  
49  
50  
51  
52  
53  
54  
55  
56  
57  
58  
59  
60



## Abstract

**Objectives:** Government spending on social care in England reduced substantially in real terms following the economic crisis in 2008, meanwhile emergency admissions to hospitals have increased. We aimed to assess the extent to which reductions in social care spend on older people have led to increases in emergency hospital admissions.

**Design:** We used negative binomial regression for panel data to assess the relationship between emergency hospital admissions and government spend on social care for older people. We adjusted for population size and for levels of deprivation and health.

**Setting:** Hospitals and adult social care services in England between April 2005 And March 2016.

**Participants:** People aged 65 years and over resident in 132 local councils.

**Outcome measures:** Primary outcome variable - emergency hospital admissions of adults aged 65 years and over. Secondary outcome measure - emergency hospital admissions for ambulatory care sensitive conditions of adults aged 65 years and over.

**Results:** We found no significant relationship between the changes in the rate of government spend (£'000s) on social care for older people within councils and our primary outcome variable, emergency hospital admissions (IRR 1.009, 95% CI 0.965-1.056) or our secondary outcome measure, admissions for ambulatory care sensitive conditions (IRR 0.975, 95% CI 0.917-1.038).

**Conclusions:** We found no evidence to support the view that reductions in government spend on social care since 2008 have led to increases in emergency hospital admissions in older people. Policy makers may wish to review schemes, such as the Better Care Fund, which are predicated on a relationship between social care provision and emergency hospital admissions of older people.

### Strengths and limitations of this study

- This study explores the relationship between government spending on social care and emergency hospital admissions across a large area (132 councils) and a long period (10 years).
- The study includes a period of time when reductions in government spending on social care were large on average and variable between councils, increasing the opportunity to detect an impact on emergency hospital admissions.
- The study used panel data methods which help reduce the risk of omitted variable bias.
- Changes in the way councils record expenditure may have obscured the relationship with emergency hospital admissions.
- Sensitivity analysis was used to explore the possibility that the results are a function of the influential outliers or the choice of analytical method.

## Introduction

The economic crisis beginning in 2008 caused many countries to cut public sector expenditure on health care. Successive governments in England have sought to maintain health spending by imposing a “ring fence”. However central government grants to local councils, who are responsible for funding social care have been reduced.<sup>1</sup> The term ‘social care’ is used to describe a range of support services which help people carry out daily living tasks and therefore live independently. This can include help with washing, dressing, cooking, cleaning, getting in and out of bed as well as fitting adaptations such as stairlifts, handrails and bath seats. Social care can be delivered within an individual’s private residence or as part of a placement in a care home or supported living scheme. Unlike health care, which is largely provided free at the point of use, social care for older people in England is means-tested and the majority of recipients will be expected to contribute towards the cost of their care. The numbers of older people receiving government-funded social care fell by 40% between March 2008 and March 2014 whilst the population aged 65+ years increased by 15%.<sup>2,3</sup> While some people who are no longer supported by the state might choose to pay for care privately or to rely on informal care, others may have to just make do with less social care support.

Meanwhile demand for urgent and emergency care is rising. The number of people aged 65+ years attending Accident and Emergency departments in England rose by 64% between 2008 and 2015.<sup>4</sup> Looking forward, the number of people aged 65+ year is expected to grow from 9.9 million in 2016 to over 12 million by 2028.<sup>5</sup> There is growing concern that under-supply of social care is increasing pressures on urgent and emergency care by leaving older people at greater risk of hospital admission and delaying their discharge from hospital. Nearly nine out of ten NHS hospital finance directors believe that funding pressures on councils have had a negative impact on the performance of health services in their local area.<sup>6</sup>

Much of the evidence supporting this claim, however, is anecdotal. The effect of reductions in social care on the health and well-being of older people, and in particular their use of emergency healthcare services has not been quantified.<sup>7</sup> A small number of studies in European countries have found evidence of a trade-off between the number of hospital beds and the level of social care provision.<sup>8,9,10</sup> The reported effect, however, was relatively small; and the research mostly focused on long-term residential care and/or hospital length of stay, and pre-dates the most significant reductions in social care expenditure.

Many health systems are exploring the benefits of greater integration between health and care services.<sup>11</sup> In England, the current government’s policy is predicated on the view that closer working between health and social care will ease pressure on emergency services. For example, the Better Care Fund, worth a minimum of £3.9 billion in 2016–17, is for joint projects between local government and the NHS.<sup>12</sup> The broad intention is to shift resources from the NHS into social care and community services by keeping patients out of hospitals, but much of the required investment will only become available if savings can be made from avoiding unplanned admissions to hospital or reducing length of stay.

The aim of this study is to determine the extent to which reductions in government spending on social care for older adults, following the economic crisis, have led to increases in emergency admissions to hospitals.

## Methods

### *Setting and study population*

Our analysis focused on local government councils with responsibility for providing adult social care services in England between 2005-06 and 2015-16. In 2015-16 there were 152 English councils with responsibility for providing adult social care services. Nine of these councils were only established following structural changes to local government in April 2009. These areas were excluded from all analyses. A further three councils were missing spend data for at least one year, these areas were also excluded. The City of London, the Isles of Scilly, and Rutland were excluded because we expected their small populations would cause instability. We excluded a further 5 councils that reported a year-on-year change in emergency hospital admissions for older people of more than 50% in one or more years between 2005/6 and 2015/16 on the basis that these jumps are implausible and are more likely to represent data errors. This left a balanced panel dataset of 1452 observations (N = 132, T = 11). The list of the councils excluded from the analysis is provided in supplementary file 1.

### *Data sources*

The data used in this study were collected from a number of national information systems. The main outcome variable in our analysis is counts of emergency admissions to hospitals (admissions that happen at short notice because of perceived clinical need) by people aged 65 years and over in each council area. We obtained this information from the Hospital Episode Statistics (HES) dataset. HES contains records of all admissions for patients admitted to NHS hospitals, and includes information on method of admission (e.g. emergency), diagnosis codes recording the primary reason the patient is being treated, and any secondary diagnoses relevant to their care.<sup>13</sup> We hypothesised that some types of admission are more likely to be avoidable by timely access to social care. Ambulatory care sensitive conditions (ACSCs) are a well-defined set of conditions where effective community care and case management can help prevent the need for hospital admission.<sup>14</sup> Counts of emergency hospital admissions of people aged 65 and over for ACSC conditions were derived from HES and used as a secondary outcome measure.

Our main exposure variable was government spending on social care. We obtained financial data relating to publicly-funded social care for older people (those aged 65+ years) from administrative returns provided to central government by the social services departments of councils providing adult social care services in England. Publicly-funded social care in England is targeted at those with the highest needs and lowest incomes. Older people who meet needs-based eligibility criteria but whose income and assets are above a set amount are required to contribute a proportion of the cost themselves, and some with needs receive no financial support. We calculated a series for councils' net expenditure by subtracting contributions paid by service users for their care from councils' gross total expenditure on services for older people. These expenditure levels include income from the NHS through schemes such as the Better Care Fund.

In 2014-15, there were changes to the financial reporting framework used by councils to collect these data that meant we needed to 'map' categories of council income across the two frameworks to obtain a consistent series on councils' income from client contributions. Bridging files were published by NHS Digital to facilitate mapping exercises of this type.<sup>15</sup>

We adjusted net total expenditure, by each council in each year, to 2015-16 prices using the Gross Domestic Product Price Deflator.<sup>16</sup> To account for differences in population size we used population estimates from the Office for National Statistics (ONS) to calculate a rate of expenditure per head of population aged 65 or over per year for each council area.<sup>17</sup>

In the UK and other countries, admission rates are significantly correlated with measures of social deprivation.<sup>18</sup> To control for socioeconomic deprivation, we used data from the Index of Multiple Deprivation (IMD) 2015, the official area-based measure of relative deprivation in England. We used

1  
2  
3 the Income Deprivation Affecting Older People Index (IDAOPI), a supplementary index to the overall  
4 income domain that measures the proportion of adults aged 60 or over living in income deprived  
5 households in each council area.<sup>19</sup> We grouped council-level IDAOPI scores into fifths, with the first  
6 quintile group representing the least deprived.  
7

8 Counts of deaths by age group, gender and local authority were supplied by the Office of National  
9 Statistics. Mortality rates for people aged 65 years and over were calculated by dividing the number  
10 of deaths by the population for each council and year.  
11  
12

### 13 *Statistical analyses*

14 We initially investigated the unadjusted trends in the rates of emergency hospital admissions and  
15 government social care spend, in total and by council.  
16

17 We used multivariable regression analysis for panel data to assess the relation between emergency  
18 hospital admissions (response variable), and net spend on government-funded social care for older  
19 people (predictor variable). We used negative binomial regression models as these are appropriate  
20 when the outcome is a count variable.<sup>20</sup> To adjust for differences in population sizes of older people  
21 we included the size of the population aged 65 years and over as an exposure variable. Panel data  
22 models were used to help reduce the risk of omitted variable bias. Given that we were interested in  
23 the population-averaged effect, we used general estimating equations to estimate the model  
24 coefficients. Decisions relating to selecting variables and the model correlation structure were made  
25 using the quaslikelihood under the independence model criterion (QIC).<sup>21</sup>  
26  
27

28 For each council we decomposed the variable representing government spending on social care into  
29 two new variables: a time-invariant average spend and a time-varying difference from average spend.  
30 This allowed us to assess the influence on our outcome of variation in social care spend 'within'  
31 councils (e.g. over time) and 'between' councils.  
32

33 Mortality rates among people aged 65 years and over and deprivation levels (IDAOPI quintiles) were  
34 used to control for differences in levels of population need.  
35

36 To adjust for the long-term trend in emergency hospital admissions and to control for unobserved in-  
37 year effects we included dummy variables for each year. We used robust standard errors to reflect the  
38 fact that populations were not sampled independently and to ensure that standard errors were robust  
39 to serial correlation in the data.  
40

41 Models were prepared for two outcome variables: all emergency admissions for people aged 65 and  
42 over (our primary outcome variable) and the subset of these which were for Ambulatory Care Sensitive  
43 Conditions (ACSC).  
44

45 Regression analyses were performed with Stata IC 15.1. Data preparation was done using R Statistical  
46 Software (version 3.3.2; R Foundation for Statistical Computing, Vienna, Austria).  
47  
48

### 49 *Sensitivity Analyses*

50 We performed several analyses to test the sensitivity of model results to outlier values and to  
51 elements of the model specification. To test the effect of outliers on the model coefficients, we  
52 calculated dfbeta values for each council for the variable representing government spend on social  
53 care and reran the model removing those councils with the highest dfbeta values. To test the  
54 sensitivity of the results on the choice of a population-averaged modelling approach, we recreated the  
55 model using a random effects approach. To test the sensitivity of the results to lagged or leading  
56 effects of the time-varying independent variables we reran the model lagging by one year the  
57 government spend on social care (on the basis that the impact of a change in social care spend may  
58 have a delayed impact on emergency admissions), and leading by one year the mortality rate variable  
59  
60

1  
2  
3 (given that emergency admissions are known to rise exponentially for several years prior to death.<sup>22</sup>  
4 Based on QIC values, our model incorporates year as a series of 10 (T-1) dummy variables, rather than  
5 as a single linear covariate. However, to assess whether the treatment of time in our model influenced  
6 the relationship between our outcome variable and our variable of interest, we produced a version of  
7 the model which incorporated time as a linear covariate. Finally we tested the sensitivity of the model  
8 results to the specification of an independent within-group correlation structure.  
9

#### 10 *Patient and Public Involvement*

11  
12 Patients and member of the public were not involved in the design of this study.  
13  
14  
15  
16  
17  
18  
19  
20  
21  
22  
23  
24  
25  
26  
27  
28  
29  
30  
31  
32  
33  
34  
35  
36  
37  
38  
39  
40  
41  
42  
43  
44  
45  
46  
47  
48  
49  
50  
51  
52  
53  
54  
55  
56  
57  
58  
59  
60

## Results

### Descriptive Analysis

Between 2005/6 and 2015/16, the population aged 65 and over grew on average by 1.9% per annum from 7.0 million to 8.4 million (see table 1). Over the same period emergency hospital admissions of patients aged 65 and over rose by 3.0% per annum (see figure 1). Government spend on social care for this age group reduced by 0.6% per annum after adjusting for inflation (see figure 2).

Table 1 : Trends in Admissions, Spend and Population 2005/06 to 2015/16

| Financial Year              | Emergency Admissions 65+ | Emergency ACS Admissions 65+ | Nominal Government Net Spend on Social Care 65+ £'000s | Real Government Net Spend on Social Care 65+ £'000s | Population 65+ |
|-----------------------------|--------------------------|------------------------------|--------------------------------------------------------|-----------------------------------------------------|----------------|
| 2005/06                     | 1,567,224                | 289,869                      | 6,343,870                                              | 7,614,136                                           | 7,003,820      |
| 2006/07                     | 1,582,563                | 290,864                      | 6,431,484                                              | 7,492,147                                           | 7,033,496      |
| 2007/08                     | 1,601,874                | 294,160                      | 6,532,431                                              | 7,429,803                                           | 7,102,647      |
| 2008/09                     | 1,711,155                | 315,962                      | 6,822,653                                              | 7,554,620                                           | 7,212,610      |
| 2009/10                     | 1,778,569                | 322,447                      | 7,037,350                                              | 7,686,557                                           | 7,341,814      |
| 2010/11                     | 1,830,922                | 343,736                      | 7,088,728                                              | 7,603,647                                           | 7,480,386      |
| 2011/12                     | 1,858,048                | 353,325                      | 6,780,726                                              | 7,173,625                                           | 7,655,402      |
| 2012/13                     | 1,931,868                | 356,201                      | 6,745,162                                              | 6,989,226                                           | 7,918,734      |
| 2013/14                     | 1,961,560                | 361,803                      | 6,772,647                                              | 6,903,890                                           | 8,127,137      |
| 2014/15                     | 2,074,679                | 399,288                      | 6,914,530                                              | 6,945,018                                           | 8,312,128      |
| 2015/16                     | 2,098,280                | 409,775                      | 7,142,173                                              | 7,142,173                                           | 8,422,502      |
| Compound annual growth rate | +3.0%                    | +3.5%                        | +1.2%                                                  | -0.6%                                               | +1.9%          |

There is considerable variation between councils in the levels of spend on social care and emergency admissions per head of population (see figure 3). Rate of social care spend and emergency admissions are notably higher in the most deprived quintile.

Figure 1 – Emergency hospital admissions aged 65+ per head of population aged 65+

Figure 2 – Nominal and real (inflation adjusted) Government net spend on social care for people aged 65+ (£'000s) per head of population aged 65+

Figure 3 : Government spend on social care (£'000s), emergency and ACSC admissions per head of population (65+) by council and IDAOP1 (deprivation) quintile

### Model Results

Having adjusted for the other model covariates, we found no statistically significant relationship between the rate of government spend on social care within a council and our primary outcome variable, emergency hospital admissions (IRR 1.009, 95% CI 0.965-1.056) – see table 2. Likewise we found no significant relationship with our secondary outcome, ambulatory care sensitive admissions (IRR 0.975, 95% CI 0.917-1.038) – see table 3.

Table 2: Model Results (outcome: emergency hospital admissions 65+, exposure: population aged 65+)

| Covariate              |                                                              | IRR              | p> z   | 95% Conf. Interval |       |       |
|------------------------|--------------------------------------------------------------|------------------|--------|--------------------|-------|-------|
| Time-varying effects   | Real Net Spend on Social Care (within effect) <sup>a*</sup>  | 1.009            | 0.410  | 0.965              | 1.056 |       |
|                        | Deaths <sup>**</sup>                                         | 1.010            | <0.001 | 1.007              | 1.014 |       |
| Time invariant effects | Real Net Spend on Social Care (between effect) <sup>b*</sup> |                  | 1.138  | <0.001             | 1.079 | 1.200 |
|                        | Deprivation (IDAOP1)                                         | Quintile 1 (ref) | 1.000  | -                  | -     | -     |
|                        |                                                              | Quintile 2       | 1.059  | 0.048              | 1.000 | 1.121 |
|                        |                                                              | Quintile 3       | 1.145  | <0.001             | 1.099 | 1.193 |
|                        |                                                              | Quintile 4       | 1.156  | <0.001             | 1.088 | 1.228 |
|                        |                                                              | Quintile 5       | 1.226  | <0.001             | 1.148 | 1.310 |
| Year                   | 2005/06 (ref)                                                |                  | 1.000  | -                  | -     | -     |
|                        | 2006/07                                                      |                  | 1.024  | <0.001             | 1.012 | 1.037 |
|                        | 2007/08                                                      |                  | 1.034  | <0.001             | 1.021 | 1.047 |
|                        | 2008/09                                                      |                  | 1.090  | <0.001             | 1.076 | 1.105 |
|                        | 2009/10                                                      |                  | 1.143  | <0.001             | 1.121 | 1.165 |
|                        | 2010/11                                                      |                  | 1.167  | <0.001             | 1.141 | 1.194 |
|                        | 2011/12                                                      |                  | 1.179  | <0.001             | 1.148 | 1.212 |
|                        | 2012/13                                                      |                  | 1.183  | <0.001             | 1.152 | 1.216 |
|                        | 2013/14                                                      |                  | 1.175  | <0.001             | 1.139 | 1.211 |
|                        | 2014/15                                                      |                  | 1.230  | <0.001             | 1.189 | 1.273 |
| 2015/16                |                                                              | 1.203            | <0.001 | 1.168              | 1.240 |       |
| Constant               |                                                              | 0.107            | <0.001 | 0.089              | 0.130 |       |

<sup>a</sup> in-year difference from average spend in the local authority between 2005/6 and 2015/16

<sup>b</sup> average spend in the local authority between 2005/6 and 2015/16

\* per head population aged 65+

\*\* per 1,000 population aged 65+

Table 3: Model Results (outcome: ACS hospital admissions 65+, exposure: population aged 65+)

| Covariate              |                                                              | IRR              | p> z   | 95% Conf. Interval |       |       |
|------------------------|--------------------------------------------------------------|------------------|--------|--------------------|-------|-------|
| Time-varying effects   | Real Net Spend on Social Care (within effect) <sup>a*</sup>  | 0.975            | 0.790  | 0.917              | 1.038 |       |
|                        | Deaths**                                                     | 1.014            | <0.001 | 1.008              | 1.019 |       |
| Time invariant effects | Real Net Spend on Social Care (between effect) <sup>b*</sup> |                  | 1.230  | <0.001             | 1.138 | 1.330 |
|                        | Deprivation (IDAOP1)                                         | Quintile 1 (ref) | 1.000  | -                  | -     | -     |
|                        |                                                              | Quintile 2       | 1.100  | 0.001              | 1.038 | 1.165 |
|                        |                                                              | Quintile 3       | 1.234  | <0.001             | 1.169 | 1.303 |
|                        |                                                              | Quintile 4       | 1.269  | <0.001             | 1.188 | 1.356 |
|                        |                                                              | Quintile 5       | 1.352  | <0.001             | 1.226 | 1.491 |
| Year                   | 2005/06 (ref)                                                |                  | 1.000  | -                  | -     | -     |
|                        | 2006/07                                                      |                  | 1.018  | 0.019              | 1.003 | 1.033 |
|                        | 2007/08                                                      |                  | 1.031  | 0.001              | 1.013 | 1.050 |
|                        | 2008/09                                                      |                  | 1.090  | <0.001             | 1.069 | 1.112 |
|                        | 2009/10                                                      |                  | 1.138  | <0.001             | 1.102 | 1.174 |
|                        | 2010/11                                                      |                  | 1.202  | <0.001             | 1.159 | 1.247 |
|                        | 2011/12                                                      |                  | 1.235  | <0.001             | 1.182 | 1.290 |
|                        | 2012/13                                                      |                  | 1.197  | <0.001             | 1.145 | 1.252 |
|                        | 2013/14                                                      |                  | 1.188  | <0.001             | 1.133 | 1.244 |
|                        | 2014/15                                                      |                  | 1.302  | <0.001             | 1.237 | 1.371 |
| 2015/16                |                                                              | 1.281            | <0.001 | 1.226              | 1.337 |       |
| Constant               |                                                              | 0.015            | <0.001 | 0.011              | 0.020 |       |

<sup>a</sup> in-year difference from average spend in the local authority between 2005/6 and 2015/16

<sup>b</sup> average spend in the local authority between 2005/6 and 2015/16

\* per head population aged 65+

\*\* per 1,000 population aged 65+

### Sensitivity Analyses

We reproduced the models excluding the nine councils with the highest  $\delta\beta$  values (more than 2 standard deviations from zero) for the variable representing government spend on social care within councils. This did not alter the significance of the incident risk ratio for social care spend.

Similarly, reproducing the model with a random effects formulation did not alter the significance of the incident risk ratio for social care spend.

Lagging the variable representing government spend on social care (within councils) and leading the variable representing mortality rate by one time unit did not alter the significance of the incident risk ratio for social care spend.



1  
2  
3 When we incorporated year as a linear covariate (rather than as a set of dummy variables), the  
4 incident risk ratio increased marginally and became statistically significant.  
5

6 The incidence risk ratio for social care spend was not materially altered when alternative within-group  
7 correlation structures (exchangeable, unstructured and autoregressive order 1) were specified.  
8

9 Supplementary file 2 contains the model coefficient and 95% confidence intervals for our variable of  
10 interest in each of the sensitivity analyses described above.  
11  
12  
13  
14  
15  
16  
17  
18  
19  
20  
21  
22  
23  
24  
25  
26  
27  
28  
29  
30  
31  
32  
33  
34  
35  
36  
37  
38  
39  
40  
41  
42  
43  
44  
45  
46  
47  
48  
49  
50  
51  
52  
53  
54  
55  
56  
57  
58  
59  
60

For peer review only

## Discussion

### *Key findings*

Across our study population, Government spend on social care for people aged 65 and over fell by £472m (6.2%) in real terms between 2005/6 and 2015/16. We conclude that this was not associated with an increase in emergency hospital admissions. This finding is at odds with both intuition and the perceptions of those working in acute hospitals. We will explore a range of potential (and interrelated) explanations for this effect.

The prima-facie explanation for the observed results is that social care provision is not an effective means of preventing emergency hospital admissions for older people. It is likely that individuals who have been affected by reductions in social care spend to date are those whose need levels are close to eligibility thresholds and therefore have the lowest ability to benefit. It does not necessarily follow therefore that further reductions in social care spend will not result in increases in emergency hospital admissions. Moreover, our finding should not be taken as evidence of the ineffectiveness of social care in more general respects. The effectiveness of social care with respect to quality of life, for example, has been studied elsewhere and whilst this evidence base remains limited, on balance it suggests that the provision of social care leads to quality of life benefits.<sup>23</sup>

Another explanation for the findings is that social care provision may avoid hospital admissions by improving the health status of older people but that these gains are offset as social workers and social care professionals identify unmet need and trigger a healthcare intervention leading to hospital admission. This could arise for example if a social care professional notices a deterioration in a patient's health status, referring the patient to a General Practitioner or Emergency Department. Whilst the UK has a strong primary health care system and might be expected to manage clinical risks in these circumstances, GP services are under pressure and access to primary care remains a problem. These direct and countervailing effects may be reduced in tandem as social care spend is reduced. This mechanism has been proposed for other interventions that aimed, but failed to reduce emergency admissions in older people.<sup>24</sup>

A third explanation focuses on the effect of substituting government funded social care for privately funded social care and informal care. Whilst substitution may not occur in all cases, privately funded social care and informal care may be allocated more efficiently than government-funded social care, offsetting the losses associated with those individuals who now receive no care. However, the English Longitudinal Study of Ageing (ELSA) suggests that the use of privately funded social care fell between 2004/5 and 2014/15 for those reporting problems with activities of daily living (e.g. walking, bathing, dressing) and instrumental activities of daily living (e.g. cooking, shopping).<sup>25</sup> While public and private provision have been falling informal care has increased substantially. A survey conducted by Department of Work & Pensions estimates that 8% (4.9million) of people were informal carers in England in 2016.<sup>26</sup> Since 2004 the average daily minutes of adult care provided by those aged 8 or over has risen year on year.<sup>27</sup> The gross value added of informal adult care in the UK increased by 45.8% between 2005 and 2014, from £39.0 billion to £56.9 billion.<sup>28</sup> These figures demonstrate a substantial and sustained shift from public to informal care provision over the period of this study.

Whilst healthcare services have been spared the severe funding cuts seen in other public services, healthcare services nonetheless report significant funding pressures. Many initiatives have sought to manage demand for emergency hospital admissions and a recent study demonstrated that thresholds for admission via emergency departments increased over the period from 2009/10 to 2014/15.<sup>29</sup> These supply constraints and changes in clinical behaviour may explain why reductions in social care spend have not resulted in increases in emergency hospital admissions.

Finally, we consider the impact of substantial funding constraints on the efficiency of social care services. To accommodate cuts in funding many social services departments have tightened need-based access criteria for services and have introduced reablement and preventative services to reduce

1  
2  
3 long-term demand for care. This may have increased the efficiency of social care, improving the  
4 health status of service users and offsetting the losses to those who no longer receive government  
5 funded care. Local authorities facing the largest cuts may have undertaken the most radical redesign  
6 of services and achieved the greatest efficiency gains.  
7

### 8 9 10 *Limitations*

11 Ecological studies of this type are susceptible to a number of forms of bias. However, our  
12 conservative modelling approach and the study's statistical power imply that it is extremely unlikely  
13 that reductions in social care spend resulted in material increases in emergency admissions at a  
14 population level. None of the sensitivity analyses provided contrary evidence.  
15

16 As with all observational studies, we must consider the possibility that our observed result can be  
17 explained by the omission of a key explanatory variable. Given the use of panel data, any influential  
18 omitted variable must be a time-varying effect operating within councils, which is strongly associated  
19 with our dependant variable and our variable of interest. One candidate is household income.  
20 However, income inequality in retired households has grown since 2009/10 and over the same period  
21 councils with higher levels of deprivation have seen larger reductions in social care spend.<sup>30</sup> We  
22 would expect these changes to amplify rather than obscure or repress any relationship between social  
23 care spend and emergency admissions.  
24

25 Given the ecological nature of our study, we should consider the possibility that reductions in social  
26 care spend have indeed resulted in increases in emergency admissions, but that equivalent reductions  
27 in emergency hospital admissions have occurred in other groups of older people. We can think of no  
28 clear mechanism that might correspond to this theory.  
29

30 In 2014/15, the financial reporting framework used to collect data from councils on government spend  
31 on social care was substantially redesigned. The mapping of categories required to create consistent  
32 time series introduces the potential for error. However, our sensitivity analyses did not indicate that  
33 the results were substantially affected by the presence of outliers. A small number of councils were  
34 excluded from our analysis. Whilst the rationale for the exclusions are clear and explicitly described,  
35 this process may have introduced bias.  
36

37 Whilst this study did not explicitly control for changes in the age profile or morbidity levels of the  
38 study population, the use of mortality rates as an independent variable adjusts for these factors  
39 indirectly.  
40  
41

### 42 43 *Relation to Existing Literature*

44 Unlike our study, the small number of previous studies which have explored the relationship between  
45 social spend or provision and healthcare use have found evidence of a substitution effect. A cross-  
46 sectional analysis using small area data in England found the cost effects of a transfer of resources  
47 from hospitals to care homes were broadly neutral, but this study pre-dates the recent significant  
48 reductions in social care expenditure.<sup>8</sup> A later study using panel data found delayed discharges from  
49 hospitals in England responded, if only weakly, to increases in the supply of care home beds.<sup>9</sup> A  
50 Norwegian study, using patient level data, reported that after controlling for casemix, hospital, and  
51 time fixed effects, higher levels of social care capacity were associated with reduced hospital length of  
52 stay.<sup>10</sup> A 2012 study demonstrated interactions in the use of hospital care and social care for older  
53 people in England and that residents of care homes tended to use hospitals less frequently than  
54 people receiving home care.<sup>31</sup> A working paper published by the Institute of Fiscal Studies concluded  
55 that cuts in government spending on social care had led to increases in attendances at English  
56 accident and emergency departments, but not to subsequent hospital admissions.<sup>32</sup>  
57  
58  
59  
60

### *Implications for Policy and Research*

We recommend further work on this subject to verify or rebut our results, to test the credibility of the mechanisms we have proposed to explain our results or to identify and test alternative mechanisms. We have made the panel dataset available with this paper to allow others to replicate the study's methods and explore alternative approaches to test the relationship between emergency hospital admissions and spend on social care.

Observational studies that operate at the patient level may provide insights into the relationship between social care spend and hospital admissions that cannot be obtained via ecological studies. Qualitative research could be used to explore the mechanisms by which social care influences health care use.

Policy makers should review schemes, such as the Better Care Fund, which are predicated on the belief that emergency hospital admissions can be reduced by increasing social care provision. Our analysis suggests that this approach is unlikely to succeed. Given the scale of the Better Care Fund, a comprehensive evaluation is warranted. Healthcare commissioners should consider alternative, evidence-based methods of moderating demand for emergency hospital care.

We note that the NHS's latest social care funding initiative, the Improved Better Care Fund (iBCF), aims to reduce hospital length of stay and delayed transfers of care rather than prevent emergency admissions. Further research should be carried out to test the limited evidence supporting this approach.

### **Conclusion**

We found no evidence to support the view that reductions in government spend on social care since 2008 have led to increases in emergency hospital admissions in older people.

### *Contribution Statement*

Paul Seamer, Prof Simon Brake and Steven Wyatt conceived the research. Paul Seamer assembled the data. Paul Seamer and Steven Wyatt conducted the analysis and drafted the manuscript. Dr. Patrick Moore and Prof. Mohammed Mohammed offered advice on the selection of statistical model and reviewed the analysis. Prof. Brake framed the analysis within a policy context. All authors reviewed and commented on the draft manuscripts.

### *Conflicts of Interest*

SB is employed by NHS Walsall CCG which jointly commissions social care services for older people through the Better Care Fund. SB was previously employed by Coventry City Council, a commissioner and provider of social care for older people.

The authors have no other relationships or activities that could appear to have influenced the submitted work.

### *Copyright, open access and permission to reuse*

The Corresponding Author has the right to grant on behalf of all authors and does grant on behalf of all authors, a worldwide licence (<http://www.bmj.com/sites/default/files/BMJ%20Author%20Licence%20March%202013.doc>) to the Publishers and its licensees in perpetuity, in all forms, formats and media (whether known now or created in the future), to i) publish, reproduce, distribute, display and store the Contribution, ii) translate the Contribution into other languages, create adaptations, reprints, include within collections and create summaries, extracts and/or, abstracts of the Contribution and convert or allow conversion into any format including without limitation audio, iii) create any other derivative work(s) based in whole or part on the on the Contribution, iv) to exploit all subsidiary rights to exploit all subsidiary rights that currently exist or as may exist in the future in the Contribution, v) the inclusion of electronic links from the Contribution to third party material where-ever it may be located; and, vi) licence any third party to do any or all of the above. All research articles will be made available on an Open Access basis (with authors being asked to pay an open access fee—see <http://www.bmj.com/about-bmj/resources-authors/forms-policies-and-checklists/copyright-open-access-and-permission-reuse>). The terms of such Open Access shall be governed by a Creative Commons licence—details as to which Creative Commons licence will apply to the research article are set out in our worldwide licence referred to above.

### *Transparency declaration*

Paul Seamer, the lead author, affirms that the manuscript is an honest, accurate, and transparent account of the study being reported; that no important aspects of the study have been omitted.

1  
2  
3 *Ethics approval*  
4

5 Ethics approval was not required. The research used historical anonymised data and did not influence  
6 patient care.  
7  
8  
9

10  
11  
12 *Funding Statement*  
13

14 NHS Midlands and Lancashire Commissioning Support Unit received payment from NHS Coventry and  
15 Rugby Clinical Commissioning Group to conduct the initial analysis that led to this paper.  
16  
17

18  
19  
20 *Data Availability Statement*  
21

22 Extra data can be accessed via the Dryad data repository at <http://datadryad.org/> with the doi:  
23 10.5061/dryad.30qp564  
24  
25  
26  
27  
28  
29  
30  
31  
32  
33  
34  
35  
36  
37  
38  
39  
40  
41  
42  
43  
44  
45  
46  
47  
48  
49  
50  
51  
52  
53  
54  
55  
56  
57  
58  
59  
60

## References

- 1 Institute of Fiscal Studies & Nuffield Foundation, Central Cuts, Local Decision-Making: Changes in Local Government Spending and Revenues in England, 2009-10 to 2014-15, 2015 (<https://www.ifs.org.uk/uploads/publications/bns/BN166.pdf>)
- 2 NHS Digital, Community Care Statistics, Referrals, assessments and packages of care for adults - England, 2007-2008, National summary, 18 December 2008 (<https://digital.nhs.uk/catalogue/PUB01519>)
- 3 NHS Digital, Community Care Statistics, Social Services Activity, England - 2013-14, Final release (<https://digital.nhs.uk/catalogue/PUB16133>)
- 4 NHS Digital, Hospital Accident and Emergency Activity, 2016-17, October 2017, (<https://digital.nhs.uk/catalogue/PUB30112>)
- 5 Office of National Statistics, National Population Projections 2016, 2018 (<https://www.ons.gov.uk/peoplepopulationandcommunity/populationandmigration/populationprojections/bulletins/nationalpopulationprojections/2016basedstatisticalbulletin> )
- 6 Kings Fund, Quarterly Monitoring Report 1, October 2015 (<https://qmr.kingsfund.org.uk/2015/17/> )
- 7 Thorlby R, Fact of Fiction? Social care cuts are to blame for the 'crisis' in hospital emergency departments, Nuffield Trust comment, 29 January 2015 (<https://www.nuffieldtrust.org.uk/news-item/fact-or-fiction-social-care-cuts-are-to-blame-for-the-crisis-in-hospital-emergency-departments#fact-or-fiction> )
- 8 Forder J, Long-term care and hospital utilisation by older people: an analysis of substitution rates, Health Economics doi 10.1002/hec.14382009 , February 2009 (<http://onlinelibrary.wiley.com/doi/10.1002/hec.1438/abstract>)
- 9 Gaughan J, Gravelle H, Siciliani L, Testing the Bed-Blocking Hypothesis: Does Nursing and Care Home Supply Reduce Delayed Hospital Discharges?, Health Economics 10.1002/hec.3150 2March 2015 (<http://onlinelibrary.wiley.com/doi/10.1002/hec.3150/full>)
- 10 Holmas T, Islam M, Kjerstad E, Interdependency between social care and hospital care: the case of hospital length of stay, European Journal of Public Health Volume 23, Issue 6, Pages 927–93, December 2013 <https://academic.oup.com/eurpub/article/23/6/927/434760/Interdependency-between-social-care-and-hospital>)
- 11 Curry N, Ham C, Clinical and service integration, 2010 (<https://www.kingsfund.org.uk/sites/default/files/Clinical-and-service-integration-Natasha-Curry-Chris-Ham-22-November-2010.pdf> )
- 12 Department of Communities and Local Government & Department of Health, Integration and Better Care Fund planning requirements for 2017-19, (<https://www.england.nhs.uk/wp-content/uploads/2017/07/integration-better-care-fund-planning-requirements.pdf> )
- 13 NHS Digital, HES Data Dictionary – Admitted Patient Care, September 2017 (<http://content.digital.nhs.uk/media/25188/DD-APC-V10/pdf/DD-APC-V10.pdf> )
- 14 Purdy S, Griffin T, Salisbury C, Sharp D, Ambulatory care sensitive conditions: terminology and disease coding need to be more specific to aid policy makers and clinicians, Public Health. 2009 Feb;123(2):169-73. , 2010 (<https://www.ncbi.nlm.nih.gov/pubmed/19144363> )
- 15 NHS Digital, Adult Social Care Finance Return (ASC-FR) Guidance For the collection period 1 April 2015 – 31 March 2016, September 2015 ([http://content.digital.nhs.uk/media/16585/ASC-FR-Guidance-201516/pdf/ASC-FR\\_Guidance\\_2015-16\\_v1.1.pdf](http://content.digital.nhs.uk/media/16585/ASC-FR-Guidance-201516/pdf/ASC-FR_Guidance_2015-16_v1.1.pdf) )
- 16 HM Treasury, GDP deflators at market prices and money GDP, 28 November 2017 (<https://www.gov.uk/government/statistics/gdp-deflators-at-market-prices-and-money-gdp-november-2017-autumn-budget-2017> )
- 17 Office of National Statistics, Lower Super Output Area Mid-Year Population Estimates, 26 October 2017 (<https://www.ons.gov.uk/peoplepopulationandcommunity/populationandmigration/populationestimates/datasets/lowersuperoutputareamidyearpopulationestimates> )

- 1  
2  
3  
4  
5  
6  
7  
8  
9  
10  
11  
12  
13  
14  
15  
16  
17  
18  
19  
20  
21  
22  
23  
24  
25  
26  
27  
28  
29  
30  
31  
32  
33  
34  
35  
36  
37  
38  
39  
40  
41  
42  
43  
44  
45  
46  
47  
48  
49  
50  
51  
52  
53  
54  
55  
56  
57  
58  
59  
60
- 
- 18 Majeed A, Bardsley M, Morgan D, O'sullivan C, Bindman A, Cross sectional study of primary care groups in London: association of measures of socioeconomic and health status with hospital admission rates, *BMJ* 2000;321:1057, 28 October 2000 (<http://www.bmj.com/content/321/7268/1057.short> )
- 19 Department of Communities and Local Government, English Indices of Deprivation, 30 September 2015 (<https://www.gov.uk/government/statistics/english-indices-of-deprivation-2015> )
- 20 Hilbe JM, Negative Binomial regression, Cambridge University Press, 2011
- 21 Cui J, QIC program and model selection in GEE analyses, *The Stata Journal* Volume 7 Number 2: pp. 209-220, 2007 (<http://www.stata-journal.com/article.html?article=st0126> )
- 22 Seshamani M, Gray A, A longitudinal study of the effects of age and time to death on hospital costs, *J Health Econ.* 2004 Mar;23(2):217-35, 2004 (<https://www.ncbi.nlm.nih.gov/pubmed/15019753> )
- 23 Sutcliffe K, Rees R, Dickson K, Hargreaves K, Schucan-Bird K, Kwan I, Kavanagh J (all EPPI-Centre), Woodman J Gibson K, 2012, The adult social care outcomes framework: A systematic review of systematic reviews to support its use and development, December 2013 (<https://eppi.ioe.ac.uk/cms/Portals/0/PDF%20reviews%20and%20summaries/ASCOF%202012Sutcliffe%20report.pdf?ver=2013-11-14-144947-670> )
- 24 Steventon A, Bardsley M, Billings J, Georghiou T, Lewis G, An evaluation of the impact of community-based interventions on hospital use, March 2011, (<https://www.nuffieldtrust.org.uk/research/an-evaluation-of-the-impact-of-community-based-interventions-on-hospital-use> )
- 25 English Longitudinal Study of Ageing (<https://www.elsa-project.ac.uk/about-ELSA> )
- 26 Department for Work & Pensions, Family Resources Survey, 2017 (<https://www.gov.uk/government/collections/family-resources-survey--2> )
- 27 Office for National Statistics, Changes in the value and division of unpaid volunteering in the UK: 2000 to 2015, 2017 (<https://www.ons.gov.uk/economy/nationalaccounts/satelliteaccounts/articles/changesinthevalueanddivisionofunpaidcareworkintheuk/2000to2015#changes-in-the-division-of-unpaid-care-between-2000-and-2015-part-2-adult-care> )
- 28 Office for National Statistics, Household satellite accounts: 2005 to 2014, Chapter 3, 2016 (<https://www.ons.gov.uk/economy/nationalaccounts/satelliteaccounts/compendium/householdsatelliteaccounts/2005to2014/chapter3homeproducedadultcareservices#gross-value-added-of-informal-adult-care> )
- 29 Wyatt S, Child K, Hood A, Cooke M, Mohammed M, Changes in admission thresholds in English emergency department, *Emerg Med J.* doi: 10.1136/emered-2016-206213, 12 September 2017 (<http://emj.bmj.com/content/early/2017/09/12/emered-2016-206213> )
- 30 Office of National statistics , Household disposable income and inequality in the UK: financial year ending 2016, 10 January 2017 (<https://www.ons.gov.uk/peoplepopulationandcommunity/personalandhouseholdfinances/incomeandwealth/bulletins/householddisposableincomeandinequality/financialyearending2016> )
- 31 Bardsley M, Georghiou T, Chassin L, Overlap of hospital use and social care in older people in England, *Journal of Health Services Research and policy* Volume: 17 issue: 3, page(s): 133-139, July 2012 (<http://journals.sagepub.com/doi/abs/10.1258/JHSRP.2011.010171> )
- 32 Crawford R, Stoye G, Zaranka B, The impact of cuts to social care spending on the use of Accident and Emergency departments in England, IFS Working Paper W18/15, June 2018 (<https://www.ifs.org.uk/uploads/publications/wps/WP201815.pdf> )





Figure 1 – Emergency hospital admissions aged 65+ per head of population aged 65+

139x101mm (300 x 300 DPI)



Figure 2 – Nominal and real (inflation adjusted) Government net spend on social care for people aged 65+ (£'000s) per head of population aged 65+

139x101mm (300 x 300 DPI)



Figure 3 - Government spend on social care (£'000s), emergency and ACSC admissions per head of population (65+) by council and IDAOPI (deprivation) quintile

139x101mm (300 x 300 DPI)

**Supplementary File 1 – Councils with Responsibility for Social Services Excluded from Analysis**

*Established following structural changes to local government in April 2009 (n=9)*

County Durham

Shropshire

Cornwall

Wiltshire

Northumberland

Cheshire East

Cheshire West & Chester

Bedford

Central Bedfordshire

*Missing social care spend data in one or more years (n=3)*

Thurrock

Surrey

East Sussex

*Small population (n=3)*

The City of London

The Isles of Scilly

Rutland

*>50% year-on-year change in emergency hospital admissions in one or more years (n=5)*

Milton Keynes

Barnet

Enfield

Hounslow

Isle of Wight

## Supplementary File 2 – Results of Sensitivity Analyses

Coefficient for government spend on Social Care (within effect); outcome variable emergency admissions for patients aged 65+

|                                                            | <b>IRR</b> | <b>p&gt; z </b> | <b>95% Conf. Interval</b> |       |
|------------------------------------------------------------|------------|-----------------|---------------------------|-------|
| Primary Analysis                                           | 1.009      | 0.41            | 0.965                     | 1.056 |
| Sensitivity Analyses                                       |            |                 |                           |       |
| 1 : Excluding councils with highest dfbeta values          | 0.996      | 0.82            | 0.963                     | 1.030 |
| 2 : Random effects formulation                             | 1.020      | 0.15            | 0.993                     | 1.049 |
| 3 : Lagging spend on social care & leading mortality rates | 1.035      | 0.25            | 0.976                     | 1.099 |
| 4 : Treat year as linear covariate                         | 1.052      | 0.02            | 1.009                     | 1.097 |
| 5a : Correlation structure - exchangeable                  | 1.023      | 0.99            | 0.978                     | 1.069 |
| 5b : Correlation structure - unstructured                  | 1.015      | 1.00            | 0.986                     | 1.044 |
| 5c : Correlation structure – autoregressive (order1)       | 1.008      | 0.61            | 0.982                     | 1.036 |

**STROBE 2007 (v4) checklist of items to be included in reports of observational studies in epidemiology\***  
**Checklist for cohort, case-control, and cross-sectional studies (combined)**

| Section/Topic             | Item # | Recommendation                                                                                                                                                                                                                                                                                                                                                                                                                                                         | Reported on page # |
|---------------------------|--------|------------------------------------------------------------------------------------------------------------------------------------------------------------------------------------------------------------------------------------------------------------------------------------------------------------------------------------------------------------------------------------------------------------------------------------------------------------------------|--------------------|
| Title and abstract        | 1      | (a) Indicate the study's design with a commonly used term in the title or the abstract                                                                                                                                                                                                                                                                                                                                                                                 | 2                  |
|                           |        | (b) Provide in the abstract an informative and balanced summary of what was done and what was found                                                                                                                                                                                                                                                                                                                                                                    | 2                  |
| <b>Introduction</b>       |        |                                                                                                                                                                                                                                                                                                                                                                                                                                                                        |                    |
| Background/rationale      | 2      | Explain the scientific background and rationale for the investigation being reported                                                                                                                                                                                                                                                                                                                                                                                   | 3                  |
| Objectives                | 3      | State specific objectives, including any pre-specified hypotheses                                                                                                                                                                                                                                                                                                                                                                                                      | 3                  |
| <b>Methods</b>            |        |                                                                                                                                                                                                                                                                                                                                                                                                                                                                        |                    |
| Study design              | 4      | Present key elements of study design early in the paper                                                                                                                                                                                                                                                                                                                                                                                                                | 4                  |
| Setting                   | 5      | Describe the setting, locations, and relevant dates, including periods of recruitment, exposure, follow-up, and data collection                                                                                                                                                                                                                                                                                                                                        | 4                  |
| Participants              | 6      | (a) <i>Cohort study</i> —Give the eligibility criteria, and the sources and methods of selection of participants. Describe methods of follow-up<br><i>Case-control study</i> —Give the eligibility criteria, and the sources and methods of case ascertainment and control selection. Give the rationale for the choice of cases and controls<br><i>Cross-sectional study</i> —Give the eligibility criteria, and the sources and methods of selection of participants | 4                  |
|                           |        | (b) <i>Cohort study</i> —For matched studies, give matching criteria and number of exposed and unexposed<br><i>Case-control study</i> —For matched studies, give matching criteria and the number of controls per case                                                                                                                                                                                                                                                 |                    |
| Variables                 | 7      | Clearly define all outcomes, exposures, predictors, potential confounders, and effect modifiers. Give diagnostic criteria, if applicable                                                                                                                                                                                                                                                                                                                               | 4,5                |
| Data sources/ measurement | 8*     | For each variable of interest, give sources of data and details of methods of assessment (measurement). Describe comparability of assessment methods if there is more than one group                                                                                                                                                                                                                                                                                   | 4,5                |
| Bias                      | 9      | Describe any efforts to address potential sources of bias                                                                                                                                                                                                                                                                                                                                                                                                              | 4,5                |
| Study size                | 10     | Explain how the study size was arrived at                                                                                                                                                                                                                                                                                                                                                                                                                              | 4                  |
| Quantitative variables    | 11     | Explain how quantitative variables were handled in the analyses. If applicable, describe which groupings were chosen and why                                                                                                                                                                                                                                                                                                                                           | 4,5                |
| Statistical methods       | 12     | (a) Describe all statistical methods, including those used to control for confounding                                                                                                                                                                                                                                                                                                                                                                                  | 5, 6               |
|                           |        | (b) Describe any methods used to examine subgroups and interactions                                                                                                                                                                                                                                                                                                                                                                                                    | 5,6                |
|                           |        | (c) Explain how missing data were addressed                                                                                                                                                                                                                                                                                                                                                                                                                            | 4,5,6              |
|                           |        | (d) <i>Cohort study</i> —If applicable, explain how loss to follow-up was addressed<br><i>Case-control study</i> —If applicable, explain how matching of cases and controls was addressed                                                                                                                                                                                                                                                                              | 4                  |

|                          |     |                                                                                                                                                                                                              |                            |
|--------------------------|-----|--------------------------------------------------------------------------------------------------------------------------------------------------------------------------------------------------------------|----------------------------|
|                          |     | <i>Cross-sectional study</i> —If applicable, describe analytical methods taking account of sampling strategy                                                                                                 |                            |
|                          |     | (e) Describe any sensitivity analyses                                                                                                                                                                        | 5,6                        |
| <b>Results</b>           |     |                                                                                                                                                                                                              |                            |
| Participants             | 13* | (a) Report numbers of individuals at each stage of study—eg numbers potentially eligible, examined for eligibility, confirmed eligible, included in the study, completing follow-up, and analysed            | 4                          |
|                          |     | (b) Give reasons for non-participation at each stage                                                                                                                                                         | 4                          |
|                          |     | (c) Consider use of a flow diagram                                                                                                                                                                           | n/a                        |
| Descriptive data         | 14* | (a) Give characteristics of study participants (eg demographic, clinical, social) and information on exposures and potential confounders                                                                     |                            |
|                          |     | (b) Indicate number of participants with missing data for each variable of interest                                                                                                                          | 4, 7, supplementary file 2 |
|                          |     | (c) <i>Cohort study</i> —Summarise follow-up time (eg, average and total amount)                                                                                                                             | 4                          |
| Outcome data             | 15* | <i>Cohort study</i> —Report numbers of outcome events or summary measures over time                                                                                                                          | 7                          |
|                          |     | <i>Case-control study</i> —Report numbers in each exposure category, or summary measures of exposure                                                                                                         |                            |
|                          |     | <i>Cross-sectional study</i> —Report numbers of outcome events or summary measures                                                                                                                           | 7                          |
| Main results             | 16  | (a) Give unadjusted estimates and, if applicable, confounder-adjusted estimates and their precision (eg, 95% confidence interval). Make clear which confounders were adjusted for and why they were included | 8, 9                       |
|                          |     | (b) Report category boundaries when continuous variables were categorized                                                                                                                                    | 4                          |
|                          |     | (c) If relevant, consider translating estimates of relative risk into absolute risk for a meaningful time period                                                                                             | n/a                        |
| Other analyses           | 17  | Report other analyses done—eg analyses of subgroups and interactions, and sensitivity analyses                                                                                                               | 9,10                       |
| <b>Discussion</b>        |     |                                                                                                                                                                                                              |                            |
| Key results              | 18  | Summarise key results with reference to study objectives                                                                                                                                                     | 10                         |
| Limitations              | 19  | Discuss limitations of the study, taking into account sources of potential bias or imprecision. Discuss both direction and magnitude of any potential bias                                                   | 10,11                      |
| Interpretation           | 20  | Give a cautious overall interpretation of results considering objectives, limitations, multiplicity of analyses, results from similar studies, and other relevant evidence                                   | 13                         |
| Generalisability         | 21  | Discuss the generalisability (external validity) of the study results                                                                                                                                        | 12                         |
| <b>Other information</b> |     |                                                                                                                                                                                                              |                            |
| Funding                  | 22  | Give the source of funding and the role of the funders for the present study and, if applicable, for the original study on which the present article is based                                                | 14                         |

\*Give information separately for cases and controls in case-control studies and, if applicable, for exposed and unexposed groups in cohort and cross-sectional studies.

1  
2  
3  
4  
5  
6  
7  
8  
9  
10  
11  
12  
13  
14  
15  
16  
17  
18  
19  
20  
21  
22  
23  
24  
25  
26  
27  
28  
29  
30  
31  
32  
33  
34  
35  
36  
37  
38  
39  
40  
41  
42  
43  
44  
45  
46

**Note:** An Explanation and Elaboration article discusses each checklist item and gives methodological background and published examples of transparent reporting. The STROBE checklist is best used in conjunction with this article (freely available on the Web sites of PLoS Medicine at <http://www.plosmedicine.org/>, Annals of Internal Medicine at <http://www.annals.org/>, and Epidemiology at <http://www.epidem.com/>). Information on the STROBE Initiative is available at [www.strobe-statement.org](http://www.strobe-statement.org).

For peer review only
