# Supplementary material for: Did government spending cuts to social care for older people lead to an increase in emergency hospital admissions? An ecological study, England 2005–2016
Source: PubMed Central journal article supplement — BMJ Open. 2019 Apr 25;9(4):e024577. doi: 10.1136/bmjopen-2018-024577 (PMC6501965; doi:10.1136/bmjopen-2018-024577), 2019-04-25
Supplement: bmjopen-2018-024577supp001.pdf [file bmjopen-2018-024577supp001.pdf]

## **Supplementary File 1 – Councils with Responsibility for Social Services Excluded from Analysis**

*Established following structural changes to local government in April 2009 (n=9)*

County Durham  
Shropshire  
Cornwall  
Wiltshire  
Northumberland  
Cheshire East  
Cheshire West & Chester  
Bedford  
Central Bedfordshire

*Missing social care spend data in one or more years (n=3)*

Thurrock  
Surrey  
East Sussex

*Small population (n=3)*

The City of London  
The Isles of Scilly  
Rutland

*>50% year-on-year change in emergency hospital admissions in one or more years (n=5)*

Milton Keynes  
Barnet  
Enfield  
Hounslow  
Isle of Wight
