# Supplementary material for: Did government spending cuts to social care for older people lead to an increase in emergency hospital admissions? An ecological study, England 2005–2016
Source: PubMed Central journal article supplement — BMJ Open. 2019 Apr 25;9(4):e024577. doi: 10.1136/bmjopen-2018-024577 (PMC6501965; doi:10.1136/bmjopen-2018-024577), 2019-04-25
Supplement: bmjopen-2018-024577supp002.pdf [file bmjopen-2018-024577supp002.pdf]

## Supplementary File 2 – Results of Sensitivity Analyses

Coefficient for government spend on Social Care (within effect); outcome variable emergency admissions for patients aged 65+

|                                                            | <b>IRR</b> | <b>p&gt; z </b> | <b>95% Conf. Interval</b> |       |
|------------------------------------------------------------|------------|-----------------|---------------------------|-------|
| Primary Analysis                                           | 1.009      | 0.41            | 0.965                     | 1.056 |
| Sensitivity Analyses                                       |            |                 |                           |       |
| 1 : Excluding councils with highest dfbeta values          | 0.996      | 0.82            | 0.963                     | 1.030 |
| 2 : Random effects formulation                             | 1.020      | 0.15            | 0.993                     | 1.049 |
| 3 : Lagging spend on social care & leading mortality rates | 1.035      | 0.25            | 0.976                     | 1.099 |
| 4 : Treat year as linear covariate                         | 1.052      | 0.02            | 1.009                     | 1.097 |
| 5a : Correlation structure - exchangeable                  | 1.023      | 0.99            | 0.978                     | 1.069 |
| 5b : Correlation structure - unstructured                  | 1.015      | 1.00            | 0.986                     | 1.044 |
| 5c : Correlation structure – autoregressive (order1)       | 1.008      | 0.61            | 0.982                     | 1.036 |
